# Supplementary material for: Periodic DFT investigation of the effect of aluminium content on the properties of the acid zeolite H-FER
Source: Royal Society of Chemistry journal article supplement (doi:10.1039/b917969k), 2010-01-01
Supplement: b917969k.pdf [file b917969k.pdf]

## Periodic DFT investigation of the effect of aluminium content on the properties of the acid zeolite H-FER.

L. Grajciar,<sup>a</sup> C. O. Areán,<sup>b</sup> A. Pulido<sup>a</sup> and P. Nachtigall<sup>a</sup>

### 5 Supplementary Information:

**Table S1.** Relative deprotonation energy for the most stable configuration of BA sites for each Si/Al ratio (H-FER(71), H-FER(35) and H-FER(8) models) and Al distribution considered.

| H-FER sample                      | Aluminium location <sup>a</sup>           | Oxygen position <sup>b</sup> | $\Delta E_{\text{deprot}}^{\text{c}}$ (kJ/mol) | $\Delta E_{\text{deprot}}^{\text{d}}$ (kJ/mol) | $\nu_{\text{OH}}$ (cm <sup>-1</sup> ) | Al-O-Si angle (deg.) | Cluster size <sup>e</sup> | Si( <i>n</i> Al) <sup>f</sup> | NNN Al <sup>g</sup> |
|-----------------------------------|-------------------------------------------|------------------------------|------------------------------------------------|------------------------------------------------|---------------------------------------|----------------------|---------------------------|-------------------------------|---------------------|
| <b>H-FER(8)</b>                   | <b>T1</b>                                 | O(3)                         | 41                                             | 34                                             | 3539                                  | 133                  | 9T                        | 2                             | 2                   |
|                                   | <b>T2</b>                                 | O(7)                         | 38                                             | 30                                             | 3613                                  | 132                  | 12T                       | 2                             | 1                   |
|                                   | <b>T2</b>                                 | O(7)                         | 75                                             | 70                                             | 3615                                  | 133                  | 9T                        | 3                             | 3                   |
|                                   | <b>T3</b>                                 | O(4)                         | 45                                             | 37                                             | 3593                                  | 141                  | 9T                        | 2                             | 2                   |
|                                   | <b>T3</b>                                 | O(2)                         | 0                                              | 0 <sup>h</sup>                                 | 3610                                  | 136                  | 6T                        | 1                             | 0                   |
|                                   | <b>T4</b>                                 | O(6)                         | 7                                              | 3                                              | 3592                                  | 138                  | 10T                       | 1                             | 1                   |
|                                   | <b>T4</b>                                 | O(6)                         | 32                                             | 34                                             | 3618                                  | 137                  | 14T                       | 2                             | 4                   |
|                                   | <b>T4</b>                                 | O(8)                         | 42                                             | 48                                             | 3408                                  | 135                  | 18T                       | 2*                            | 3                   |
| <b>H-FER(35)</b>                  | <b>T4</b> -(Si) <sub>2</sub> - <b>T4</b>  | O(6)                         | 17                                             | 23                                             | 3605                                  | 136                  | 12T                       | 1                             | 0                   |
|                                   | T4-(Si) <sub>2</sub> - <b>T4</b>          | O(6)                         | 17                                             | 25                                             | 3606                                  | 136                  | 12T                       | 1                             | 0                   |
|                                   | <b>T3</b> -(Si) <sub>1</sub> - <b>T4</b>  | O(8)                         | 12                                             | 21                                             | 3259                                  | 134                  | 11T                       | 1*                            | 1                   |
|                                   | T3-(Si) <sub>1</sub> - <b>T4</b>          | O(6)                         | 35                                             | 39                                             | 3615                                  | 136                  | 12T                       | 2                             | 1                   |
|                                   | <b>T3</b> -(Si) <sub>1</sub> - <b>T3</b>  | O(4)                         | 20                                             | 33                                             | 3604                                  | 136                  | 8T                        | 2                             | 1                   |
|                                   | T3-(Si) <sub>1</sub> - <b>T3</b>          | O(8)                         | 31                                             | 48                                             | 2969                                  | 135                  | 11T                       | 1*                            | 1                   |
|                                   | <b>T2</b> -(Si) <sub>1</sub> - <b>T4</b>  | O(7)                         | 40                                             | 37                                             | 3601                                  | 137                  | 11T                       | 2                             | 1                   |
|                                   | T2-(Si) <sub>1</sub> - <b>T4</b>          | O(8)                         | 6                                              | 17                                             | 3274                                  | 135                  | 9T                        | 1*                            | 1                   |
|                                   | <b>T2</b> -(Si) <sub>2</sub> - <b>T2</b>  | O(7)                         | 16                                             | 7                                              | 3599                                  | 137                  | 12T                       | 1                             | 0                   |
|                                   | T2-(Si) <sub>2</sub> - <b>T2</b>          | O(7)                         | 16                                             | 7                                              | 3598                                  | 138                  | 12T                       | 1                             | 0                   |
|                                   | <b>T2</b> -(Si) <sub>3</sub> - <b>T2'</b> | O(7)                         | 23                                             | 15                                             | 3606                                  | 133                  | 12T                       | 1                             | 0                   |
| T2-(Si) <sub>3</sub> - <b>T2'</b> | O(3)                                      | 13                           | 0                                              | 3585                                           | 139                                   | 12T                  | 1                         | 0                             |                     |
| <b>H-FER(71)</b>                  | <b>T1</b>                                 | O(3)                         | 13                                             | 7                                              | 3558                                  | 137                  | 12T                       | 1                             | 0                   |
|                                   | <b>T2</b>                                 | O(7)                         | 17                                             | 14                                             | 3606                                  | 134                  | 12T                       | 1                             | 0                   |
|                                   | <b>T3</b>                                 | O(8)                         | 15                                             | 22                                             | 3607                                  | 133                  | 11T                       | 1                             | 0                   |
|                                   | <b>T4</b>                                 | O(6)                         | 12                                             | 16                                             | 3600                                  | 137                  | 12T                       | 1                             | 0                   |

<sup>a</sup> Framework position of the primary Al atom is depicted in bold; location of the secondary Al atom forming a BA site pair and number of SiO<sub>4</sub> tetrahedra separating Al atoms is also indicated for H-FER(35). <sup>b</sup> Numbering scheme from ref. 60 adopted. <sup>c</sup> Relative deprotonation energy of the BA site with respect to the most acidic BA site calculated at the periodic DFT level. <sup>d</sup> Relative deprotonation energy of the BA site with respect to the most acidic BA site calculated at the periodic QM-Pot level. <sup>e</sup> Value of the *n* parameter of the Si(*n*Al) descriptor for the BA site. Stars denote BA sites involved in intra-zeolite H-bonding. <sup>f</sup> Number of next nearest neighbor (NNN) Al atoms with respect to Al atom of the BA site. <sup>g</sup> The absolute value of deprotonation energy is 1222 kJ/mol.

## Periodic DFT investigation of the effect of aluminium content on the properties of the acid zeolite H-FER.

L. Grajciar,<sup>a</sup> C. O. Areán,<sup>b</sup> A. Pulido<sup>a</sup> and P. Nachtigall<sup>a</sup>

### Supplementary Information:

**Table S2.** The characteristics the most stable configuration of BA sites for each Si/Al ratio (H-FER(71), H-FER(35) and H-FER(8) models) and Al distribution considered.

| H-FER sample     | E <sup>c</sup> (eV)               | Aluminium location <sup>b</sup>  | Oxygen position <sup>c</sup> | $\nu_{\text{OH}}^{\text{d}}$ (cm <sup>-1</sup> ) | $\nu_{\text{OH-1D-Num}}^{\text{e}}$ (cm <sup>-1</sup> ) |
|------------------|-----------------------------------|----------------------------------|------------------------------|--------------------------------------------------|---------------------------------------------------------|
| <b>H-FER(8)</b>  | -1725.357                         | <b>T1</b>                        | O(3)                         | 3539                                             | -                                                       |
|                  |                                   | <b>T2</b>                        | O(7)                         | 3613                                             | -                                                       |
|                  |                                   | <b>T2</b>                        | O(7)                         | 3615                                             | -                                                       |
|                  |                                   | <b>T3</b>                        | O(4)                         | 3593                                             | -                                                       |
|                  |                                   | <b>T3</b>                        | O(2)                         | 3610                                             | -                                                       |
|                  |                                   | <b>T4</b>                        | O(6)                         | 3592                                             | -                                                       |
|                  |                                   | <b>T4</b>                        | O(6)                         | 3618                                             | -                                                       |
|                  |                                   | <b>T4</b>                        | O(8)                         | 3408                                             | -                                                       |
| <b>H-FER(35)</b> | -1713.758                         | <b>T4</b> -(Si) <sub>2</sub> -T4 | O(6)                         | 3605                                             | -                                                       |
|                  |                                   | T4-(Si) <sub>2</sub> - <b>T4</b> | O(6)                         | 3606                                             | -                                                       |
|                  | -1713.860                         | <b>T3</b> -(Si) <sub>1</sub> -T4 | O(8)                         | 3259                                             | -                                                       |
|                  |                                   | T3-(Si) <sub>1</sub> - <b>T4</b> | O(6)                         | 3615                                             | -                                                       |
|                  | -1714.025                         | <b>T3</b> -(Si) <sub>1</sub> -T3 | O(4)                         | 3604                                             | -                                                       |
|                  |                                   | T3-(Si) <sub>1</sub> - <b>T3</b> | O(8)                         | 2969                                             | -                                                       |
|                  | -1713.950                         | <b>T2</b> -(Si) <sub>1</sub> -T4 | O(7)                         | 3601                                             | -                                                       |
|                  |                                   | T2-(Si) <sub>1</sub> - <b>T4</b> | O(8)                         | 3274                                             | -                                                       |
|                  | -1713.846                         | <b>T2</b> -(Si) <sub>2</sub> -T2 | O(7)                         | 3599                                             | -                                                       |
|                  |                                   | T2-(Si) <sub>2</sub> - <b>T2</b> | O(7)                         | 3598                                             | -                                                       |
| -1713.846        | <b>T2</b> -(Si) <sub>3</sub> -T2' | O(7)                             | 3606                         | -                                                |                                                         |
|                  | T2-(Si) <sub>3</sub> - <b>T2'</b> | O(3)                             | 3585                         | -                                                |                                                         |
| <b>H-FER(71)</b> | -1712.068                         | <b>T1</b>                        | O(3)                         | 3558                                             | 3450                                                    |
|                  | -1712.080                         | <b>T2</b>                        | O(7)                         | 3606                                             | 3532                                                    |
|                  | -1712.055                         | <b>T3</b>                        | O(8)                         | 3607                                             | 3534                                                    |
|                  | -1712.036                         | <b>T4</b>                        | O(6)                         | 3600                                             | 3529                                                    |

<sup>a</sup> The value of the absolute electronic energy (PAW wavefunction). <sup>b</sup> Framework position of the primary Al atom is depicted in bold; location of the secondary Al atom forming a BA site pair and number of SiO<sub>4</sub> tetrahedra separating Al atoms is also indicated for H-FER(35). <sup>c</sup> Numbering scheme from ref. 60 adopted. <sup>d</sup> Relative deprotonation energy of the BA site with respect to the most acidic BA site calculated at the periodic DFT level. <sup>e</sup> The value of the OH stretching frequency calculated using  $\omega/r$  correlation, ref. 19. <sup>f</sup> The value of the OH stretching frequency calculated from the numerical solution of the 1D nuclear Schrödinger equation.

## Periodic DFT investigation of the effect of aluminium content on the properties of the acid zeolite H-FER.

L. Grajciar,<sup>a</sup> C. O. Areán,<sup>b</sup> A. Pulido<sup>a</sup> and P. Nachtigall<sup>a</sup>

### 5 Supplementary Information:

The lattice parameters of the rectangular cell ( $\alpha=\beta=\gamma=90^\circ$ ) and cartesian coordinates of atoms in the cell for the most stable configuration of BA sites for each Si/Al ratio (H-FER(71), H-FER(35) and H-FER(8) models) and Al distribution considered are provided.

10 The data record for each sample starts with a header providing the number of atoms on the first line and name of the sample with the values of the lattice parameters on the second line. The cartesian coordinates for each atom of the sample follow.

217  
H-FER(71)\_T1 19.147 14.304 15.153  
15 H 10.14382778 6.31003859 3.75186301  
O 9.39231671 3.84554723 3.96136326  
O 9.42288088 4.09534647 11.47666429  
O 9.32357813 10.26501078 3.56762595  
O 9.34753060 10.11763027 11.16543915  
20 O 11.32929171 8.56018965 3.77929141  
O 11.39338577 8.47099701 11.36559765  
O 11.02317947 5.87539100 3.74569375  
O 11.36953690 5.85343868 11.29619749  
O 11.39857726 10.91386034 5.05231576  
25 O 11.42744313 10.81594603 12.62351026  
O 11.59481731 10.83420573 2.39895138  
O 11.60347953 10.71864380 9.96003477  
O 11.81520917 3.69890787 5.05410089  
O 11.72526812 3.58096373 12.63180743  
30 O 11.53421991 3.61699656 2.39036855  
O 11.51052835 3.54695197 9.96550988  
O 12.26890764 11.31860171 7.49729923  
O 12.26676407 11.30599097 15.06028563  
O 12.45338251 3.17726289 7.53752005  
35 O 12.44705645 3.18791530 15.12869446  
O 12.90571155 1.36055403 5.63947619  
O 12.93498826 1.32347070 13.30594364  
O 12.76880432 1.33296300 1.87071959  
O 12.78895382 1.29657225 9.38345415  
40 O 12.79781097 13.08773467 5.59127834  
O 12.74438962 13.05731735 13.11271543  
O 12.88220404 13.06052904 1.79874035  
O 12.81245824 13.02084589 9.46918194  
O 13.32678792 6.91443405 5.13470262  
45 O 13.29719339 7.10832102 12.60843210  
O 13.25175000 6.95775206 2.27313541  
O 13.21771156 7.17924938 9.94011065  
O 14.19139739 0.03426490 3.71517745  
O 14.16766223 0.06098201 11.30346909  
50 O 14.00550358 10.70903767 5.57473108  
O 14.03029874 10.72199520 13.15595343  
O 14.16488463 10.73318496 1.66404994  
O 14.17408266 10.74704765 9.24522758  
O 14.37682248 3.57318198 5.74423456  
55 O 14.30735557 3.60249977 13.29491076  
O 14.15220560 3.59888474 2.00665712

O 14.13315731 3.58460177 9.56883698  
O 14.28497431 7.18762144 7.56606349  
O 14.28167680 7.18959515 15.02019030  
O 15.11151578 14.28240498 6.16616726  
5 O 15.09000039 14.14745049 13.74646966  
O 15.07427387 0.14728471 1.24816388  
O 15.05290072 14.33892893 8.83798749  
O 15.46985715 8.48799312 5.57814700  
O 15.51862076 8.52785025 13.07095410  
10 O 15.47723308 8.42429942 1.89441516  
O 15.52119169 8.47441258 9.55340180  
O 15.71615072 5.88116001 5.74957180  
O 15.62691942 5.90980036 13.10202818  
O 15.60927080 5.81144628 1.71385692  
15 O 15.50883739 5.85985731 9.53562999  
O 15.83865796 10.34079324 3.69933749  
O 15.88035818 10.46021002 11.27662207  
O 16.05775344 4.13745805 3.75498732  
O 16.06772692 3.98080819 11.33163796  
20 O 16.60349970 10.81354760 6.15800936  
O 16.62488165 10.84101776 13.75893423  
O 16.78622064 10.64421729 1.26973479  
O 16.79244805 10.68498902 8.82463426  
O 16.98886352 3.59092951 6.15253298  
25 O 16.90879111 3.69985340 13.80844193  
O 16.71305761 3.43644511 1.31594175  
O 16.68279947 3.60067617 8.80841538  
O 16.96009351 13.02289275 0.08994509  
O 16.97756619 13.02754325 7.57415665  
30 O 16.93568522 1.29935987 7.50960262  
O 16.94532120 1.28600970 14.92061402  
O 18.90520201 11.24354965 7.36297494  
O 18.90900772 11.26797333 14.98653256  
O 18.97807728 2.93193713 0.08671868  
35 O 18.98397012 2.92898819 7.75499806  
O 1.90353213 12.84780775 0.12165116  
O 1.87978183 12.86077486 7.53094841  
O 1.80907505 1.15191418 7.43459398  
O 1.80108206 1.13617840 15.10159312  
40 O 2.05356940 10.53131609 6.23750897  
O 2.05050105 10.66636907 13.76135781  
O 1.84883317 10.42985394 1.25965477  
O 1.84501717 10.57206549 8.89242552  
O 1.91060066 3.53035830 6.20877555  
45 O 1.99492183 3.43396705 13.76667445  
O 2.14822148 3.42262694 1.28093180  
O 2.21996115 3.35222341 8.85901522  
O 2.86665770 3.83886596 3.77437883  
O 2.86614726 3.91808027 11.33899267  
50 O 2.71411786 10.12202932 3.72850260  
O 2.71227688 10.01386198 11.30969276  
O 3.39215596 8.33224824 5.56996180  
O 3.25913708 8.34723937 13.31395595  
O 3.35514103 8.32276780 1.89290644  
55 O 3.20216564 8.32819760 9.31035206  
O 3.30535835 5.71819102 5.59778075  
O 3.23361051 5.72782423 13.25369505  
O 3.34408714 5.70581515 1.93755687

O 3.30005420 5.71041385 9.41717633  
O 3.73847360 14.18274941 6.19428102  
O 3.67337647 14.14568902 13.77848111  
O 3.76060012 14.33248537 1.29173982  
5 O 3.68425178 14.28211707 8.86478500  
O 4.65601619 7.00146029 7.51163738  
O 4.65088726 6.98277976 15.13579634  
O 4.59826929 10.69383808 5.49833584  
O 4.61894270 10.60952650 13.04861673  
10 O 4.41198546 10.76339000 1.77418427  
O 4.44620200 10.67584079 9.40062496  
O 4.50816635 3.36209095 5.82967299  
O 4.60580636 3.46194205 13.30849386  
O 4.72164199 3.44604366 1.92579889  
15 O 4.78218045 3.52086238 9.55504782  
O 4.67073318 14.16084798 3.74629332  
O 4.59485521 14.17717168 11.32411801  
O 5.62766664 6.93334946 5.07871421  
O 5.49589573 7.02522521 12.65707697  
20 O 5.63171429 7.00868280 2.41301008  
O 5.49504365 7.13526199 9.99092224  
O 6.03148335 12.90944598 5.67830171  
O 5.96463787 12.88647188 13.22384703  
O 5.97080951 12.89728943 1.77972151  
25 O 5.90747361 12.88032799 9.38876827  
O 5.98922078 1.17073759 5.63048197  
O 5.91788593 1.15523146 13.22907116  
O 6.07275233 1.15736525 1.91770175  
O 5.98631052 1.14873552 9.46772236  
30 O 6.29838965 11.01399467 7.52978688  
O 6.30376826 11.01032313 15.08372443  
O 6.46538058 2.94240786 7.56525086  
O 6.46423035 2.93815118 15.12403179  
O 7.21736287 10.61269974 5.10191737  
35 O 7.24306976 10.62808524 12.66504828  
O 6.97487574 10.53139426 2.42881431  
O 7.03606903 10.55641552 10.00181697  
O 7.04389915 3.52945313 5.07581492  
O 7.18275551 3.41516887 12.65215945  
40 O 7.32050746 3.43731373 2.40103696  
O 7.38470532 3.34602716 9.99036635  
O 7.50723296 8.33057876 3.78575964  
O 7.42744811 8.30920710 11.36829130  
O 7.59656652 5.74843899 3.71558024  
45 O 7.31360804 5.68352041 11.26813325  
Al 12.38352947 7.20840326 3.73229487  
Si 12.33310657 7.15596800 11.30308867  
Si 10.93602104 10.11179291 3.70422999  
Si 10.95557624 10.02958138 11.28001191  
50 Si 10.95616847 4.16427673 3.78611527  
Si 11.02077577 4.27136654 11.34049864  
Si 12.62857226 11.49995495 5.92342231  
Si 12.62919253 11.47530142 13.48900085  
Si 12.73361880 11.47463276 1.45593941  
55 Si 12.72169124 11.44969327 9.04865161  
Si 12.91092774 2.94454915 5.99957090  
Si 12.86056511 2.92481449 13.57617183  
Si 12.75532274 2.92631465 1.54636062

Si 12.73186054 2.90094838 9.11738996  
Si 13.75360164 0.01357588 5.28087158  
Si 13.73415858 14.32291669 12.86830757  
Si 13.73182147 0.04582172 2.15539407  
5 Si 13.70675574 0.00181916 9.74499674  
Si 14.67023590 7.12127755 5.98405738  
Si 14.68219047 7.18675056 13.45625452  
Si 14.62560298 7.09858738 1.45875124  
Si 14.63524202 7.17411591 9.14118335  
10 Si 15.47264907 10.07815075 5.26035014  
Si 15.50945391 10.13530215 12.82542469  
Si 15.55579505 10.02632752 2.13131017  
Si 15.58338344 10.08951992 9.72298496  
Si 15.77738918 4.31174146 5.34313095  
15 Si 15.71993846 4.30199296 12.88702330  
Si 15.63131323 4.26215869 2.19418478  
Si 15.59476645 4.26030359 9.80118895  
Si 16.00969376 14.32256756 7.52270477  
Si 16.00953506 14.32225327 15.07839338  
20 Si 17.30657060 11.43902001 7.47881817  
Si 17.30778679 11.44042995 15.10439808  
Si 17.38495023 2.85628580 7.55062120  
Si 17.37290440 2.84080690 15.10952249  
Si 1.39950645 11.30798829 7.50766793  
25 Si 1.40587943 11.30779871 15.10964321  
Si 1.46214009 2.73667463 7.56127024  
Si 1.46209917 2.72697042 15.13284182  
Si 2.78134219 14.20332432 7.51053138  
Si 2.78750664 14.19697718 15.14514713  
30 Si 3.19037469 9.91846664 5.26841554  
Si 3.16333195 9.90999142 12.86521695  
Si 3.08803543 9.90451795 2.16290081  
Si 3.05853459 9.89596877 9.72895787  
Si 3.15040699 4.11776248 5.34860928  
35 Si 3.17996904 4.13581266 12.91640320  
Si 3.26667771 4.10478106 2.22260303  
Si 3.29138223 4.12482279 9.78592673  
Si 4.24256545 7.00131948 5.93927338  
Si 4.16132083 7.02243399 13.58299117  
40 Si 4.24224333 7.00735140 1.55749334  
Si 4.16451359 7.04183643 9.06409403  
Si 5.10082742 14.19074402 5.31405615  
Si 5.03513393 14.17864762 12.89077619  
Si 5.11201754 14.21684832 2.18235219  
45 Si 5.03987669 14.20501490 9.75908534  
Si 6.03144141 11.30566763 5.95608415  
Si 6.02515470 11.28414356 13.50656456  
Si 5.91735944 11.29808158 1.48274978  
Si 5.91993278 11.28037806 9.08711444  
50 Si 5.99367346 2.74516884 6.02680584  
Si 6.03594633 2.74091594 13.56825074  
Si 6.12886951 2.73751750 1.54473617  
Si 6.14352581 2.73497979 9.14558272  
Si 6.56093985 7.01799235 3.74828762  
55 Si 6.42722896 7.03570763 11.32186366  
Si 7.75904651 9.94398647 3.72211687  
Si 7.75768533 9.90129197 11.30162873  
Si 7.79989767 4.12861954 3.78377910

Si 7.81883625 4.14214825 11.34512932

217

H-FER(71)\_T2 19.147 14.304 15.153

5 H 10.41663065 3.08013888 5.70642672  
O 9.23179849 4.09855205 3.58020272  
O 9.29405240 4.05968324 11.09508608  
O 9.37731249 10.11542707 3.93094072  
O 9.38909595 10.11794106 11.47918892  
10 O 11.31249072 8.33288761 3.67643242  
O 11.31252810 8.32165197 11.27929341  
O 11.62733058 5.72166034 3.87366020  
O 11.33853147 5.70218153 11.40277542  
O 11.69151060 10.56028032 5.07748803  
15 O 11.71435249 10.56975456 12.63598334  
O 11.45288029 10.66506187 2.40978325  
O 11.48385312 10.63459051 9.97037740  
O 11.25711950 3.25250079 5.23874069  
O 11.32781108 3.32446510 12.62164485  
20 O 11.74825436 3.23497993 2.43807336  
O 11.58890407 3.48318290 9.97193905  
O 12.45417733 11.00984334 7.55139109  
O 12.43635834 10.94675180 15.13753943  
O 12.29300040 2.88336229 15.02194650  
25 O 12.31982396 2.80485433 7.57046951  
O 12.78618917 1.09910096 5.57697750  
O 12.70636353 1.10635337 13.07622793  
O 13.02337870 1.07027794 1.65214169  
O 12.79355928 1.14904505 9.58741970  
30 O 12.88542867 12.83734802 5.66902027  
O 12.87662950 12.84697742 13.33212360  
O 12.84261738 12.82493608 1.83256100  
O 12.76736564 12.88693035 9.40944914  
O 13.31726300 7.36348990 5.08571793  
35 O 13.21570906 7.08833818 12.65104619  
O 13.33327851 7.16712746 2.42708192  
O 13.18008021 6.96795585 9.97339817  
O 14.17764166 14.15339886 3.72055481  
O 14.18903453 14.06389100 11.35261887  
40 O 14.29457697 10.59362967 5.68542373  
O 14.30308875 10.61489315 13.28821969  
O 14.07575777 10.48324237 2.04661961  
O 14.11035460 10.61104952 9.60662483  
O 13.86714930 3.55411330 5.48739202  
45 O 13.94206852 3.45671732 12.99387717  
O 14.26054663 3.41157651 1.53610083  
O 14.18874025 3.40097218 9.33310006  
O 14.16634563 7.01005066 15.09615918  
O 14.17483900 6.99189218 7.54390923  
50 O 15.08913752 14.26390481 6.18678699  
O 15.02297403 0.02352058 13.83435897  
O 15.21355448 13.93739159 1.32799476  
O 15.01823522 14.21334610 8.85986837  
O 15.68580453 8.32214504 5.78168592  
55 O 15.54567246 8.26288007 13.17734090  
O 15.62362381 8.35049438 1.73240601  
O 15.44130652 8.31959993 9.48416503  
O 15.39194171 5.71738909 5.54668799

O 15.41712654 5.65420085 13.16846718  
O 15.52690501 5.73265818 1.85667592  
O 15.48163627 5.71154355 9.48598541  
O 16.04610712 10.03576920 3.75544321  
5 O 16.05013557 10.11930537 11.34197473  
O 15.79165884 3.83649299 3.69478723  
O 15.93770642 3.82701591 11.30899361  
O 16.90798843 10.63275748 6.16208325  
O 16.90691283 10.43635140 13.80919186  
10 O 16.62132219 10.77164710 1.29660844  
O 16.65309723 10.57468924 8.82510348  
O 16.43023027 3.36193795 6.20557293  
O 16.47898558 3.32133438 13.82721359  
O 16.88271982 3.50870556 1.31786426  
15 O 16.79067028 3.50391939 8.84716626  
O 16.97634908 12.87539470 14.84210524  
O 16.90702757 12.89110666 7.55380813  
O 16.97523314 1.13638113 0.08483786  
O 16.94665094 1.16485987 7.59096169  
20 O 18.95189281 11.18815053 0.14989650  
O 18.94424622 11.22042580 7.73826400  
O 18.87163057 2.92730086 14.84390428  
O 18.82954430 2.98294802 7.27410858  
O 1.71607159 13.05864966 7.53948120  
25 O 1.70925469 13.05234648 15.01466450  
O 1.77925508 1.33187360 7.53301409  
O 1.84034726 1.32486418 0.02359201  
O 1.90044386 10.78604483 6.16198109  
O 1.92618588 10.71161988 13.76790564  
30 O 2.19120151 10.86213911 1.27692990  
O 2.18892799 10.78419243 8.82156471  
O 1.99465478 3.60515552 6.16746235  
O 2.06152660 3.57105257 13.77400294  
O 1.73881164 3.67632830 1.27421111  
35 O 1.76013570 3.65425765 8.83138093  
O 2.72419142 4.04552340 3.68997391  
O 2.69299794 4.02103591 11.26931146  
O 2.81309103 10.26943080 3.75671548  
O 2.80988925 10.30834242 11.32936996  
40 O 3.09986279 8.46880736 5.70369091  
O 3.17730084 8.44758962 13.19657209  
O 3.23343506 8.48984168 1.82002146  
O 3.27842560 8.45954023 9.47519090  
O 3.24559246 5.85748021 5.56449951  
45 O 3.26943836 5.83631409 13.12417167  
O 3.13503566 5.87084539 1.80317964  
O 3.14321616 5.84812393 9.38847900  
O 3.61588436 14.31356361 6.18574747  
O 3.66752227 0.00589114 13.77778601  
50 O 3.63094520 14.18562194 1.29260909  
O 3.63675501 14.32335967 8.85968630  
O 4.53884455 7.13990249 7.51975407  
O 4.54690335 7.13652669 15.07813890  
O 4.52085804 10.70831981 5.76233685  
55 O 4.54046928 10.72139747 13.31937521  
O 4.74782706 10.66277399 1.99355775  
O 4.74579979 10.66416760 9.55938999  
O 4.56975106 3.55528409 5.53169148



O 4.61754571 3.55312339 13.03213306  
O 4.34417687 3.49936987 1.64120775  
O 4.37061932 3.49027966 9.26800025  
O 4.55756381 14.30019034 3.73997364  
5 O 4.56078328 14.28992563 11.31539302  
O 5.42037449 7.33561921 5.05560747  
O 5.49299718 7.24639383 12.63522672  
O 5.43784991 7.08769782 2.39106596  
O 5.47588150 7.01076765 9.96891654  
10 O 5.87925696 12.98449834 5.65090921  
O 5.90734453 12.99329724 13.22033479  
O 5.96489891 13.03109122 1.86060341  
O 5.92543425 13.04500591 9.38897325  
O 5.89345000 1.25265839 5.65483402  
15 O 5.94921641 1.26365384 13.17846425  
O 5.81795423 1.30149708 1.80782153  
O 5.87798209 1.31517598 9.44036093  
O 6.41678784 11.19726296 7.54873476  
O 6.41161413 11.20765411 15.12942880  
20 O 6.30907617 3.10171991 7.51150156  
O 6.30167916 3.10674195 15.06552126  
O 7.08946976 10.69967790 5.06416913  
O 7.11824225 10.70219044 12.65430789  
O 7.35279221 10.83999009 2.40800847  
25 O 7.34547922 10.88478668 9.99637083  
O 7.18679463 3.48811691 5.07749907  
O 7.23495900 3.52346156 12.64565613  
O 6.88269574 3.65295203 2.42306961  
O 6.93769226 3.67793431 9.98953753  
30 O 7.33042971 8.46994059 3.62647700  
O 7.31756286 8.49676533 11.17478502  
O 7.25457899 5.84636121 3.85900721  
O 7.39767739 5.87695261 11.39668988  
Al 10.93379974 4.19124661 3.58964940  
35 Si 10.89334963 4.14710195 11.28830979  
Si 10.96976929 9.91115016 3.77063691  
Si 10.98339895 9.91127566 11.34281251  
Si 12.38628455 7.11407298 3.76022966  
Si 12.27401097 7.02026085 11.32739311  
40 Si 12.83553101 11.23784526 5.98835109  
Si 12.83409038 11.24101616 13.59101863  
Si 12.71243386 11.22754320 1.56306695  
Si 12.70929548 11.28206217 9.13107913  
Si 12.65023708 2.64506201 6.00438486  
45 Si 12.57814900 2.68893807 13.44400444  
Si 12.81058022 2.66768173 1.40224491  
Si 12.73731722 2.70937292 9.14960461  
Si 13.74798941 14.15176653 5.28083094  
Si 13.70222287 14.18009838 12.90704275  
50 Si 13.80915861 14.09355995 2.13221630  
Si 13.69911299 14.15820977 9.80460062  
Si 14.63375737 7.09347514 5.98448527  
Si 14.58303783 7.00158500 13.52605727  
Si 14.65371520 7.05878960 1.49900662  
55 Si 14.56511496 7.00312703 9.12199732  
Si 15.72211340 9.89214216 5.33878328  
Si 15.69168524 9.85882241 12.90644580  
Si 15.59011117 9.91076867 2.20036090

Si 15.56092306 9.90706870 9.80802460  
Si 15.38968415 4.12696541 5.23478770  
Si 15.44076210 4.06268131 12.84161129  
Si 15.59880420 4.12645307 2.10126739  
5 Si 15.59436116 4.11383298 9.75039628  
Si 16.03739996 14.17046974 15.09458225  
Si 15.98249430 14.21280434 7.54987286  
Si 17.34561960 11.32793633 7.56669459  
Si 17.35525877 11.31615985 15.10351182  
10 Si 17.24667259 2.75632929 7.47765072  
Si 17.29177687 2.72467267 15.09888578  
Si 1.42133050 11.46149701 7.56285902  
Si 1.42577964 11.45437648 15.12599165  
Si 1.32524177 2.88854764 7.45891311  
15 Si 1.36108839 2.87083125 15.05919972  
Si 2.69815379 0.00011026 7.52961162  
Si 2.72025583 14.31747830 15.10163622  
Si 3.09291864 10.05712789 5.34090758  
Si 3.12196225 10.04715838 12.90231008  
20 Si 3.24921284 10.07106337 2.20520935  
Si 3.25676319 10.05546640 9.78827769  
Si 3.13997931 4.26831418 5.24227765  
Si 3.16509597 4.24490239 12.80860149  
Si 2.99633970 4.27837448 2.10677594  
25 Si 2.99936088 4.25595690 9.69213869  
Si 4.07964551 7.19409059 5.95903391  
Si 4.12387407 7.16300742 13.50830732  
Si 4.09077310 7.14778791 1.48858017  
Si 4.11216886 7.11901631 9.08945733  
30 Si 4.98412549 14.29717537 5.30856809  
Si 5.01910242 14.31072175 12.87715687  
Si 4.99279549 14.29642013 2.17241309  
Si 4.99686981 14.32888670 9.74898925  
Si 5.97245258 11.39685521 5.99817674  
35 Si 5.99053400 11.40696505 13.57442532  
Si 6.10949253 11.43852823 1.55635290  
Si 6.10027664 11.44963877 9.12116514  
Si 5.97604940 2.85313291 5.93940101  
Si 6.01674528 2.86068689 13.48700625  
40 Si 5.84141848 2.89227957 1.45880516  
Si 5.86889722 2.89814239 9.06182263  
Si 6.35726393 7.18029827 3.73166373  
Si 6.41179555 7.16054914 11.29408181  
Si 7.77787634 10.02557298 3.75511608  
45 Si 7.78358005 10.04639788 11.32499014  
Si 7.65649802 4.27382714 3.71627163  
Si 7.70558792 4.28443555 11.28639099

217

50 H-FER(71)\_T3 19.147 14.304 15.153  
H 9.02613337 6.18025326 5.67659282  
O 1.70684082 4.00778296 4.30513597  
O 1.75667509 4.03416625 11.83741830  
O 1.73342355 10.11938964 4.07750318  
55 O 1.70792241 10.09416551 11.58958270  
O 3.75311041 8.42055830 4.18935580  
O 3.71914474 8.42100864 11.93026096  
O 3.56798973 5.81512884 3.84396862

O 3.69543186 5.80997055 11.63741106  
O 3.93680259 10.82898868 5.33163629  
O 3.84618988 10.88669962 12.89635714  
O 3.89654922 10.60522511 2.67767587  
5 O 3.93514952 10.50026778 10.25481559  
O 4.07644690 3.67710037 5.37914158  
O 4.07549641 3.54088832 12.96086323  
O 3.75254100 3.39234419 2.75211315  
O 3.83777479 3.50567194 10.30406381  
10 O 4.64478991 11.22337068 7.82871828  
O 4.65030617 11.14137532 0.23416487  
O 4.67267478 3.01905547 7.85838247  
O 4.66093787 3.02397952 0.31307081  
O 5.30725488 1.37221133 5.86054654  
15 O 5.23639000 1.24621655 13.56941924  
O 5.02289883 1.19176085 9.75548135  
O 5.06022034 1.16363538 2.17268319  
O 5.18737442 13.07995669 6.01273779  
O 5.27799361 12.98397440 13.59730486  
20 O 5.01039160 12.89983820 9.87183358  
O 5.12584737 12.89755443 2.18620969  
O 5.61808336 6.79765766 5.19984719  
O 5.65283109 6.94284093 13.01074014  
O 5.44214379 7.18081132 2.56126898  
25 O 5.50200509 7.28450411 10.36250801  
O 6.52749701 14.24950218 4.01317564  
O 6.48846413 14.29059718 11.60429964  
O 6.51654632 10.77451344 5.98894123  
O 6.42213015 10.57838375 13.48226850  
30 O 6.51766423 10.72335020 9.64096360  
O 6.49478767 10.63217293 2.06159671  
O 6.60344749 3.68632850 6.18409354  
O 6.61950056 3.50491679 13.76006602  
O 6.45172057 3.43265461 9.78950079  
35 O 6.37413625 3.46044433 2.31063867  
O 6.48180429 6.89288761 7.94797966  
O 6.67967424 7.02751891 0.26477110  
O 7.51556367 0.00083592 6.44170888  
O 7.55066829 14.31851521 13.99919167  
40 O 7.21399555 14.16948900 9.08485409  
O 7.32551951 14.26265495 1.51403339  
O 7.88212516 8.48057734 5.93868215  
O 7.88254894 8.36958182 13.44945589  
O 7.84015056 8.35739253 2.27453787  
45 O 7.82696777 8.39379957 9.72148549  
O 8.17571302 5.76433463 5.91897582  
O 7.99861819 5.74861733 13.49135911  
O 7.71646820 5.75905196 2.37167535  
O 7.68713819 5.79752162 10.05887081  
50 O 8.25424690 10.31849814 4.03546385  
O 8.25748551 10.23990618 11.59077263  
O 8.30506559 3.82768581 4.08111517  
O 8.27266973 3.79897171 11.67677444  
O 9.12549568 10.77666748 6.45640520  
55 O 9.02616080 10.68862122 14.05433304  
O 9.11546386 10.63036254 9.13923986  
O 9.10008974 10.58002105 1.56946547  
O 9.25724646 3.40000015 6.49893480

O 9.24897556 3.46861641 14.07874349  
O 9.00359197 3.69346816 9.13706295  
O 8.94198225 3.54295526 1.56547833  
O 9.27605338 12.99032778 7.91444630  
5 O 9.27387046 12.92599035 0.31610569  
O 9.19004319 1.25577773 8.06852463  
O 9.33158634 1.20632570 0.36095225  
O 11.29254894 11.30021694 7.83327908  
O 11.25797440 11.18827068 0.20707283  
10 O 11.27508799 2.89153052 8.10180111  
O 11.28520056 2.96576492 0.52052402  
O 13.38192857 12.89438579 8.01030143  
O 13.23241463 12.93056109 0.38119839  
O 13.25953269 1.17408176 7.90464349  
15 O 13.25341993 1.20098850 0.41693216  
O 13.52837050 10.62882482 6.62529606  
O 13.55203991 10.66057272 14.20070153  
O 13.35002095 10.55957596 9.28827246  
O 13.35351799 10.62890769 1.71322425  
20 O 13.34801995 3.51307776 6.61263099  
O 13.40874331 3.46652527 14.18828477  
O 13.55367400 3.43743707 9.27791051  
O 13.54654907 3.50538959 1.70997908  
O 14.29995374 3.88495348 4.19486820  
25 O 14.28246408 3.89945072 11.75060998  
O 14.20694827 10.12539936 4.14380028  
O 14.21685023 10.11522421 11.72634035  
O 14.76257143 8.35700279 6.04877331  
O 14.71422457 8.34942555 13.65265278  
30 O 14.70051466 8.33983085 9.80835845  
O 14.63771916 8.36324661 2.19567540  
O 14.67793899 5.74085000 6.06650136  
O 14.65376336 5.73732037 13.64013773  
O 14.76915830 5.75708458 2.37493680  
35 O 14.75183727 5.72420614 9.87171784  
O 15.17134980 14.24381975 6.60187792  
O 15.10389444 14.24663684 14.18206081  
O 15.19534901 0.00524010 9.27652545  
O 15.14128305 14.20312899 1.70364473  
40 O 16.07857269 7.01630437 7.94771841  
O 16.04541957 7.00059510 0.38387154  
O 16.09805081 10.65107690 5.92458503  
O 16.12323091 10.59100983 13.50305955  
O 15.96578957 10.66427953 2.21953349  
45 O 15.94865868 10.68982353 9.78852286  
O 15.96563083 3.41698433 6.22764836  
O 16.02566176 3.46830287 13.71444320  
O 16.13879990 3.46297691 9.90249139  
O 16.13406256 3.47981659 2.31979884  
50 O 16.07732181 14.19041845 4.14592643  
O 16.06422014 14.18833303 11.74590529  
O 16.98117211 6.96257060 5.48790075  
O 16.94489764 6.98581248 13.07543366  
O 16.96423493 7.21774564 2.83015288  
55 O 16.98843331 7.09372455 10.40592873  
O 17.43963001 12.93884382 6.07379686  
O 17.37716815 12.92428127 13.70028475  
O 17.39051983 12.91264854 9.81002258

O 17.40876355 12.88383957 2.23376846  
O 17.42267037 1.20950834 6.00019861  
O 17.38369502 1.19099727 13.63556619  
O 17.41405034 1.15139821 2.23780074  
5 O 17.49569328 1.18015954 9.93204033  
O 17.79968583 11.07308849 7.93179073  
O 17.82017645 11.03403264 0.36113823  
O 17.89501314 2.93654742 7.96925756  
O 17.89145587 2.98931857 0.38041581  
10 O 18.71764284 10.69406718 5.50266932  
O 18.73172295 10.73454051 13.06413735  
O 18.56090595 10.57494220 2.83570765  
O 18.53607136 10.59755249 10.40100423  
O 18.52504512 3.56319017 5.50091753  
15 O 18.60724986 3.46676485 13.05472395  
O 18.73245576 3.36409906 2.83996033  
O 18.74990563 3.46601063 10.38613464  
O 18.88061512 8.35360924 4.25713923  
O 18.82158771 8.37794100 11.82807510  
20 O 18.82253914 5.74139830 4.02184122  
O 18.86305891 5.75749504 11.72804753  
Al 6.88145340 7.12429006 6.30191393  
Si 7.05007881 7.02818770 13.83695414  
Si 3.34250387 9.98265695 4.07426695  
25 Si 3.31361374 9.97087178 11.66321550  
Si 3.28759666 4.23557543 4.06762667  
Si 3.35023236 4.22647026 11.68209727  
Si 4.61728754 7.05808210 3.97745997  
Si 4.65554957 7.11315441 11.73296300  
30 Si 5.08183931 11.46888596 6.28169023  
Si 5.06088290 11.39311956 13.83679737  
Si 5.03228284 11.33446799 9.40237320  
Si 5.04816293 11.31820879 1.79728920  
Si 5.14883628 2.92461108 6.31388252  
35 Si 5.15167422 2.82944308 13.92825170  
Si 5.00215964 2.78965319 9.43492161  
Si 4.96359812 2.76043174 1.88483889  
Si 6.12818748 14.33627619 5.58723802  
Si 6.13851361 14.29452049 13.19153466  
40 Si 6.01268752 14.22601156 2.46778875  
Si 5.93136450 14.22533589 10.07657425  
Si 6.86510970 7.09258191 9.48708591  
Si 6.90669821 7.08764435 1.86804670  
Si 7.93626322 10.05358615 5.61454071  
45 Si 7.89321839 9.96960472 13.14806386  
Si 7.91480588 9.97167188 2.49173697  
Si 7.91734011 9.98664299 10.02011790  
Si 8.06635130 4.07528332 5.65290487  
Si 8.02693955 4.13891369 13.24690900  
50 Si 7.81834243 4.15037456 2.54728225  
Si 7.84216780 4.18992203 10.15774735  
Si 8.28978663 14.26691331 7.87539433  
Si 8.36059568 14.25935644 0.26017834  
Si 9.68450298 11.41696820 7.83582761  
55 Si 9.65276344 11.34704336 0.24972228  
Si 9.67617404 2.79342507 7.97093170  
Si 9.69338123 2.78785797 0.33614304  
Si 12.89524708 11.34803517 7.93852771

Si 12.85508459 11.35201358 0.34145113  
Si 12.87805914 2.74980013 7.97339691  
Si 12.88454388 2.78092148 0.41598391  
Si 14.26116248 14.24737030 7.94935717  
5 Si 14.19420971 14.23057701 0.38130758  
Si 14.65561406 9.94196398 5.69318899  
Si 14.65636009 9.93060798 13.27742450  
Si 14.55035644 9.94667925 2.56710600  
Si 14.56346900 9.92408708 10.15304964  
10 Si 14.58598597 4.14208237 5.77227750  
Si 14.60063374 4.14229494 13.32367788  
Si 14.69456437 4.15540997 2.64226975  
Si 14.68917756 4.13121714 10.19622246  
Si 15.62867539 7.02385442 6.38478245  
15 Si 15.59298513 7.02195115 13.97278409  
Si 15.63275379 7.04278170 9.51241177  
Si 15.60750644 7.08198925 1.94747908  
Si 16.52685610 14.23128525 5.70766357  
Si 16.48097490 14.22391245 13.31798121  
20 Si 16.50951858 14.19302350 2.57821167  
Si 16.53471286 14.24040788 10.18955734  
Si 17.50625469 11.33837971 6.35854471  
Si 17.50616085 11.32159478 13.94584506  
Si 17.41580213 11.31764893 9.48938174  
25 Si 17.43667982 11.28678288 1.91923903  
Si 17.45030344 2.78172144 6.41741894  
Si 17.47291543 2.77885347 13.97711102  
Si 17.56053477 2.76038582 9.54673876  
Si 17.53515492 2.74539663 1.94472155  
30 Si 17.90548969 7.06794756 4.15063814  
Si 17.89637598 7.05424612 11.75760641  
Si 0.13741197 9.93454840 4.16425773  
Si 0.11086709 9.94862924 11.72370573  
Si 0.10975069 4.17310875 4.16489981  
35 Si 0.15454376 4.18407965 11.75246687

217

H-FER(71)\_T4 19.147 14.304 15.153

H 5.46627933 9.34799612 2.87421163  
40 O 16.95826024 2.64670887 3.16157699  
O 16.96393132 2.70351120 10.72891722  
O 16.87697357 8.67743564 2.73300320  
O 16.95148871 8.72754339 10.35346021  
O 18.93599470 7.05813651 3.14851484  
45 O 18.97972730 7.06900800 10.68158798  
O 18.83411369 4.45163512 2.73592222  
O 18.92846074 4.45826826 10.45083979  
O 18.84517520 9.48363232 4.27188245  
O 19.00213090 9.45849217 11.83617988  
50 O 0.08183289 9.21309846 1.62338074  
O 0.13587561 9.24476852 9.17817233  
O 0.20966316 2.35363588 4.30458760  
O 0.16619683 2.24578344 11.87024344  
O 19.04017675 2.02317664 1.66749770  
55 O 19.02651759 2.11350050 9.20538432  
O 0.73148159 9.80736194 6.68077645  
O 0.80523584 9.71145890 14.30003224  
O 0.79499579 1.66453831 6.77021862

O 0.78838246 1.68313345 14.35627399  
O 1.23958339 14.30425559 4.76684072  
O 1.26730348 14.25330028 12.43526819  
O 1.23426646 14.14897339 1.02998966  
5 O 1.17773731 14.19728298 8.68430199  
O 1.02638726 11.72660338 4.87164722  
O 1.24104195 11.63305375 12.52699299  
O 1.24004852 11.53702775 1.04838403  
O 1.24503264 11.57758053 8.61279012  
10 O 1.62623876 5.43434697 4.27015502  
O 1.74757087 5.61329860 11.85381723  
O 1.65204087 5.89733908 1.62524007  
O 1.69596733 5.86280827 9.19095520  
O 2.55819957 12.84839539 2.96662612  
15 O 2.54916820 12.86446365 10.55138146  
O 2.37977458 9.47754988 4.56565874  
O 2.50388670 9.29693060 12.29807610  
O 2.66470438 9.31402914 0.99237560  
O 2.68521561 9.35961313 8.41052542  
20 O 2.76673472 2.07759406 5.05447169  
O 2.72187190 2.12710940 12.59922819  
O 2.54329129 2.10349045 1.15885654  
O 2.53132184 2.13969223 8.74182441  
O 2.54294992 5.59505975 6.71487600  
25 O 2.61541001 5.70042070 14.33521092  
O 3.40227035 12.84853212 5.44943986  
O 3.52093367 12.93312236 12.98789857  
O 3.51059166 12.83854083 0.51830356  
O 3.47795561 12.97591587 8.11210624  
30 O 3.75330005 6.98886924 4.74855957  
O 3.92389302 7.05895330 12.45442399  
O 3.99817591 7.00873958 1.04705801  
O 3.97498710 7.03360234 8.44935895  
O 4.01450088 4.40381041 4.83826794  
35 O 4.05204623 4.42823955 12.48247158  
O 3.84486327 4.40923628 1.18635428  
O 3.89162381 4.42514281 8.70765045  
O 4.58456283 8.93092582 2.80625174  
O 4.31248616 8.76131828 10.43339031  
40 O 4.40679586 2.53004541 2.99066985  
O 4.39194492 2.60116092 10.56759801  
O 5.20099741 9.42693185 5.37545031  
O 5.10441761 9.39655727 12.84144044  
O 5.27764530 9.24978610 0.34236978  
45 O 5.31350050 9.29556274 8.06242142  
O 5.38932000 2.22224384 5.40855580  
O 5.34038134 2.16083349 12.97718495  
O 5.12228751 2.20417342 0.48754769  
O 5.11113694 2.15768151 8.07825237  
50 O 5.36533363 11.64851997 6.81783566  
O 5.40895378 11.61293710 14.29649036  
O 5.29863173 14.25005518 6.67893500  
O 5.36785568 14.23129287 14.37485763  
O 7.42138474 10.00893456 6.65632420  
55 O 7.38811370 9.87172634 14.07412640  
O 7.38977846 1.51154470 6.96172625  
O 7.40228628 1.56361134 14.50485171  
O 9.59444556 11.47291608 6.86991009

O 9.40524975 11.52626714 14.45531465  
O 9.32561045 14.09424814 6.72068114  
O 9.34265100 14.13890884 14.25092691  
O 9.62050304 9.25902379 5.39877665  
5 O 9.71538236 9.33283475 12.99625592  
O 9.37277652 9.14334564 0.49611992  
O 9.45639224 9.10825163 8.05870813  
O 9.46418211 2.07478886 5.42186248  
O 9.49572332 2.14290665 13.01179978  
10 O 9.71144522 2.00414159 0.52543606  
O 9.71756480 2.00330758 8.07942525  
O 10.42030305 2.48869413 3.00772553  
O 10.41155006 2.47005644 10.56562476  
O 10.29796534 8.72917854 2.92375426  
15 O 10.29795197 8.72382875 10.51474739  
O 10.84997931 6.96925891 4.84113710  
O 10.80814346 6.98718383 12.47197196  
O 10.74679493 6.93326326 1.01446961  
O 10.78556195 6.90159215 8.64691976  
20 O 10.73128628 4.34468199 4.89270661  
O 10.78232446 4.37096534 12.38425078  
O 10.85437868 4.31619472 1.12354761  
O 10.91497948 4.28697821 8.68749367  
O 11.25325973 12.88261614 5.37734364  
25 O 11.21885059 12.76849317 12.96764765  
O 11.27524117 12.97600055 0.48620833  
O 11.35582939 13.05041997 8.05016207  
O 12.16066722 5.63288850 6.74538644  
O 12.14354751 5.60440454 14.32088121  
30 O 12.19940568 9.25387307 4.69200685  
O 12.26032300 9.19924431 12.21958066  
O 11.98133780 9.29467339 0.92558121  
O 12.05800889 9.24215759 8.58199661  
O 12.08979234 2.06228579 5.04771270  
35 O 12.11342081 2.08199762 12.58365223  
O 12.29305652 2.08364701 1.17788761  
O 12.29454203 2.02230988 8.75819996  
O 12.19313619 12.80332162 2.93626070  
O 12.19061506 12.82288896 10.53216538  
40 O 13.03790057 5.52645157 4.27887576  
O 13.05444408 5.67612948 11.86171495  
O 13.06140700 5.74559204 1.61773171  
O 13.11632342 5.72941623 9.18602293  
O 13.51932498 11.55375383 4.88747579  
45 O 13.52457841 11.52968903 12.44982632  
O 13.45333493 11.49709369 0.97845964  
O 13.46433050 11.49468943 8.59741446  
O 13.51745368 14.17495093 4.80668552  
O 13.46215991 14.14477394 12.47783017  
50 O 13.60420073 14.11274742 1.08554091  
O 13.69310283 14.10851819 8.73796432  
O 13.88959236 9.66177655 6.71503505  
O 13.89785574 9.63839045 14.27945818  
O 14.01954641 1.54441372 6.78107942  
55 O 14.01864541 1.60002501 14.35477718  
O 14.82254206 9.33180735 4.27591420  
O 14.87528171 9.32947782 11.85285086  
O 14.54977583 9.16927123 1.62400651



O 14.65000743 9.20503531 9.18637873  
O 14.64969483 2.16156488 4.30989025  
O 14.67802530 2.06711674 11.85615029  
O 14.90392097 1.99836516 1.64766693  
5 O 14.91396973 2.06731137 9.19452279  
O 14.90195662 6.96952713 3.06917474  
O 14.98141339 6.98159322 10.59824932  
O 14.95460762 4.35955174 2.86269954  
O 14.93203427 4.36118587 10.54127699  
10 Al 3.89170389 8.67733864 4.56309339  
Si 3.95162651 8.62288577 12.00043068  
Si 18.47535976 8.60602635 2.95796809  
Si 18.55347806 8.62507124 10.50747133  
Si 18.54652701 2.86772212 2.97063121  
15 Si 18.55718877 2.88062286 10.55976978  
Si 0.71793269 5.71807722 2.95781234  
Si 0.79412460 5.74860505 10.53803756  
Si 1.00228692 10.10478580 5.09710885  
Si 1.11589494 10.02581983 12.73419561  
20 Si 1.17962260 9.95179915 0.70864522  
Si 1.20130487 9.99699141 8.21857949  
Si 1.25200634 1.51791028 5.21803631  
Si 1.24049346 1.49135521 12.80762250  
Si 1.12848698 1.40538539 0.76865189  
25 Si 1.11742594 1.44208021 8.34521621  
Si 2.06416871 12.92452923 4.52397306  
Si 2.14376137 12.92259521 12.12131313  
Si 2.13752634 12.85057701 1.39727034  
Si 2.11224991 12.90023390 8.98277936  
30 Si 2.99587261 5.64183013 5.14176942  
Si 3.08199392 5.70121328 12.77215818  
Si 3.00992361 5.72881626 0.75972475  
Si 3.02429116 5.72673012 8.25800184  
Si 4.08459570 8.60569956 1.20759194  
35 Si 4.06579129 8.61279961 8.83351863  
Si 4.13311174 2.81390196 4.57009252  
Si 4.11667284 2.83192795 12.14865851  
Si 3.97563068 2.80744145 1.45332640  
Si 3.97686754 2.83041779 9.01156033  
40 Si 4.37719220 12.92254578 6.75571558  
Si 4.43513910 12.91284562 14.33094405  
Si 5.80460121 10.08142692 6.71065053  
Si 5.79244156 10.04711643 14.15253143  
Si 5.78665874 1.44491803 6.78284586  
45 Si 5.79909388 1.45191115 14.36965687  
Si 9.02170105 9.96186232 6.74327837  
Si 8.98684628 9.96877726 14.29424746  
Si 8.98244049 1.33662462 6.79334916  
Si 8.99816017 1.37757737 14.35936663  
50 Si 10.38706529 12.87194890 6.75518921  
Si 10.32363312 12.85363329 14.32485591  
Si 10.74826121 8.55270641 4.47767250  
Si 10.77676864 8.55893032 12.05569607  
Si 10.61480419 8.52093986 1.34447793  
55 Si 10.66099598 8.49522200 8.94789731  
Si 10.68465344 2.74344726 4.59015541  
Si 10.70838915 2.76477006 12.13390680  
Si 10.82432173 2.72188261 1.45267038

Si 10.83843310 2.69506175 9.01340365  
Si 11.69467042 5.62304163 5.18714946  
Si 11.70070042 5.65868088 12.75662322  
Si 11.70303004 5.64664204 0.73391550  
5 Si 11.74554665 5.63284442 8.31795319  
Si 12.62183554 12.85326481 4.50449572  
Si 12.59842787 12.82041187 12.10668634  
Si 12.63158966 12.84315635 1.37136249  
Si 12.67472594 12.86128696 8.97818985  
10 Si 13.60052330 9.94932454 5.14394047  
Si 13.63208448 9.92634053 12.70337865  
Si 13.47035605 9.89936011 0.67306172  
Si 13.51096622 9.90095593 8.27634696  
Si 13.56340759 1.39982806 5.23022021  
15 Si 13.56515107 1.38787378 12.80954506  
Si 13.69513704 1.36258057 0.77705007  
Si 13.72119283 1.34938484 8.36403166  
Si 13.98031859 5.64734119 2.95820316  
Si 14.01101238 5.68771280 10.54543995  
20 Si 15.28360717 8.53974826 2.92928577  
Si 15.35514526 8.55922842 10.49923920  
Si 15.36018237 2.79222446 2.99406463  
Si 15.36277098 2.79901825 10.57793776

25 218

H-FER(35)\_T2-(Si)<sub>1</sub>-T4 19.147 14.304 15.153  
H 9.60347218 7.28611135 7.66263451  
H 11.65911645 5.47085573 13.01813463  
O 8.39847178 8.37897846 5.64858707  
30 O 8.41424991 8.36784763 13.34836824  
O 8.48611362 0.03554627 6.04380219  
O 8.51466306 0.02144755 13.58356219  
O 10.44359925 12.61386778 5.87333361  
O 10.49817724 12.62112654 13.37536875  
35 O 10.80204776 9.98694586 5.90526505  
O 10.45388441 10.01073608 13.63366522  
O 10.79162348 0.59968160 7.13273990  
O 10.83737169 0.56567871 14.70145924  
O 10.54893365 0.53611368 4.47971831  
40 O 10.57556932 0.57641541 12.05156236  
O 10.44924645 7.47014113 7.20802440  
O 10.49697742 7.59434692 14.78076483  
O 10.83660419 7.57616222 4.33298957  
O 10.67592834 7.81515448 12.13110267  
45 O 11.56511735 0.83835609 9.63109376  
O 11.53982610 0.83762451 2.07161153  
O 11.60382196 6.77582952 1.90840161  
O 11.42366614 6.74190271 9.55353568  
O 12.03501542 5.35680211 7.36735568  
50 O 11.95106887 5.38335829 14.80321663  
O 12.21808304 5.35372787 4.03605693  
O 11.91238175 5.35416663 12.05516614  
O 12.08723444 2.78036065 7.91208386  
O 12.02381522 2.80441260 0.35342932  
55 O 11.87687765 2.75159988 3.88545573  
O 11.89140559 2.78764889 11.40788639  
O 12.48601327 11.59512424 7.17551989  
O 12.40525237 11.40837995 14.73586205

O 12.43936384 11.55234921 4.50618198  
O 12.29486430 11.15734474 12.07156726  
O 13.42724321 3.75185610 5.80527107  
O 13.42233393 3.70760567 13.42585043  
5 O 13.38394835 0.47304355 7.73729344  
O 13.42196815 0.55477588 0.22821103  
O 13.18591135 0.45112821 4.15215863  
O 13.21800527 0.53913635 11.72115634  
O 13.02131011 7.82948517 7.63919537  
10 O 13.12373175 7.75248585 15.07788590  
O 13.40256123 7.69590539 3.60441478  
O 13.47254481 7.61373741 11.34940701  
O 13.31300342 11.25342744 2.03998673  
O 13.31841810 11.25893531 9.64872783  
15 O 14.29707243 4.24693749 8.23878108  
O 14.18822458 4.35510248 0.73502233  
O 14.26470973 3.78726967 3.34003328  
O 14.05410190 4.27657987 10.88174137  
O 14.83262351 12.59519346 7.88583471  
20 O 14.71417558 12.56358709 0.17789623  
O 14.74405530 12.66633150 3.78576747  
O 14.51948313 12.57910089 11.62640484  
O 14.57088375 9.97843274 7.67201073  
O 14.59310235 9.94724615 0.09646742  
25 O 14.60576920 10.04218696 4.03308216  
O 14.65941355 9.98917281 11.58930066  
O 15.17202115 14.30487049 5.84159584  
O 15.16597280 0.05244579 13.44436305  
O 14.90278611 8.09450702 5.80431816  
30 O 15.14461499 8.10967928 13.39496360  
O 15.98303293 0.61181009 8.25705149  
O 16.02831570 0.42712234 0.74601069  
O 15.71310352 0.76091057 3.38578622  
O 15.75014963 0.46451958 10.91561325  
35 O 15.60902612 7.61907109 8.30188902  
O 15.64024498 7.60907764 0.77528470  
O 16.01547446 7.86915690 3.41954705  
O 16.07626821 7.84948704 10.94464982  
O 16.14614474 2.85734633 1.77468090  
40 O 15.96513409 2.82362140 9.74634265  
O 16.03063800 5.45749038 2.27091570  
O 16.11890638 5.45778614 9.74129702  
O 18.06778085 1.10926727 2.26996846  
O 18.02888957 1.17243777 9.83397914  
45 O 17.99568672 7.15552536 1.83884609  
O 18.02807611 7.22627859 9.31754264  
O 0.85219550 2.94866758 9.62676466  
O 0.83655199 2.95292205 2.04791922  
O 0.94704274 5.56230011 9.65393418  
50 O 0.98770191 5.57513176 2.08218763  
O 0.98564326 0.64926099 8.28689406  
O 1.04229764 0.65297866 0.71899993  
O 1.29598229 0.70398849 3.38334285  
O 1.25172540 0.68638492 10.95174658  
55 O 1.23401582 7.82138234 8.28702770  
O 1.13284196 7.84862333 0.71007754  
O 0.89051100 7.90308365 3.37610817  
O 0.93500664 7.88667695 10.93734944

O 1.86502110 8.28732738 5.79064662  
O 1.84836616 8.28435136 13.37570377  
O 1.92609558 0.18279634 5.87833310  
O 1.91845125 0.18533532 13.44025764  
5 O 2.22264408 12.70710465 7.80436916  
O 2.24392647 12.69538664 0.19348516  
O 2.39658562 12.71896349 3.98491552  
O 2.39168504 12.72302333 11.54653649  
O 2.41938312 10.09828063 7.65011438  
10 O 2.41123421 10.08251076 0.09765536  
O 2.27444889 10.10380680 3.89152056  
O 2.27694466 10.10743682 11.48513299  
O 2.76774988 4.19347414 8.29003457  
O 2.77066427 4.16746706 0.71194389  
15 O 2.78924068 4.13825282 3.38788861  
O 2.78861469 4.17301557 10.96289472  
O 3.67868763 11.39445715 9.61629504  
O 3.68040030 11.40828376 2.04102302  
O 3.60819169 0.62714629 7.90564700  
20 O 3.65801161 0.59310567 0.26839387  
O 3.85137614 0.59014998 4.10855218  
O 3.82531262 0.60932155 11.65325597  
O 3.78582785 7.82008833 7.55870453  
O 3.70035132 7.75839563 0.05078160  
25 O 3.49376398 7.73428031 3.75527529  
O 3.55499464 7.77797495 11.39801892  
O 3.70099097 4.18556964 5.84500454  
O 3.70580239 4.19134690 13.41651987  
O 4.56208458 11.62501664 7.15397558  
30 O 4.57722431 11.56579146 14.73275819  
O 4.59211985 11.27810794 4.49863883  
O 4.59461152 11.30143144 12.06948385  
O 5.02796776 2.86332673 7.74661247  
O 5.03702505 2.85749697 0.15434053  
35 O 5.10247045 2.93612073 3.94666902  
O 5.09601007 2.94349252 11.50831339  
O 5.04379863 5.48096262 7.76233674  
O 5.04271334 5.47189413 0.19290912  
O 4.99160440 5.55423596 3.95204764  
40 O 5.00706052 5.56163445 11.52973167  
O 5.53685447 1.08372662 9.66137648  
O 5.52068568 1.08637412 2.08621766  
O 5.44886949 7.34761413 9.60278154  
O 5.44928554 7.34221906 2.03407075  
45 O 6.17005035 0.53996017 7.17220297  
O 6.24106992 0.56011356 14.77241173  
O 6.45934172 0.73373632 4.52039063  
O 6.43864204 0.73893852 12.11147529  
O 6.40264905 7.67679521 7.17721864  
50 O 6.30503327 7.71406896 14.73710762  
O 6.03235270 7.92051164 4.53508703  
O 6.14379209 7.89208321 12.07368480  
O 6.48599312 12.69065245 5.69844825  
O 6.48484447 12.70258259 13.29653259  
55 O 6.38818272 10.07384801 6.02759962  
O 6.42651935 10.08714039 13.53868213  
Al 10.10208560 8.45974068 5.60177919  
Al 11.86907939 7.04017776 11.19298283

Si 6.81624938 8.51542888 13.41998847  
Si 10.02533231 8.44840918 13.44854645  
Si 10.07895711 14.18977379 5.87913500  
Si 10.11036801 14.19239190 13.43563111  
5 Si 11.52999344 11.39950883 5.86084734  
Si 11.42289306 11.28906364 13.44606810  
Si 11.96052703 1.16272073 8.08548518  
Si 11.95606769 1.17552697 0.54297403  
Si 11.79936147 1.13999226 3.64968461  
10 Si 11.81525218 1.16031433 11.19628628  
Si 11.81573913 6.82452245 8.01486673  
Si 11.79439958 6.91130259 0.31721951  
Si 11.99154682 6.87609222 3.49579286  
Si 12.96407005 4.02007743 7.33484571  
15 Si 12.91013665 4.04320445 14.95150916  
Si 12.93604821 3.92953784 4.26004488  
Si 12.87644883 3.95821590 11.91677603  
Si 13.79437664 11.34879204 8.09305394  
Si 13.75415339 11.28521930 0.47613594  
20 Si 13.76798953 11.36885100 3.60000744  
Si 13.69209326 11.23727793 11.23303450  
Si 14.83754226 14.16043741 7.42402509  
Si 14.82275415 14.15223185 15.01400348  
Si 14.70152403 14.21720054 4.28711544  
25 Si 14.66485368 14.16204943 11.91865149  
Si 14.53915221 8.38509023 7.36006074  
Si 14.63006139 8.35603133 14.91306687  
Si 14.71388485 8.42958142 4.22064962  
Si 14.80167140 8.37722617 11.81723560  
30 Si 15.16309866 4.11750551 2.03411371  
Si 15.12297287 4.19424405 9.63732533  
Si 16.42917968 1.26466703 9.67944500  
Si 16.48037451 1.28455839 2.05191017  
Si 16.44423046 7.05067002 9.58087946  
35 Si 16.40955267 7.02988468 2.07907790  
Si 0.51583858 1.36150779 9.67258134  
Si 0.54629717 1.35477544 2.10107377  
Si 0.51426480 7.12328535 9.55871016  
Si 0.48885631 7.11686398 2.00725504  
40 Si 1.85088009 4.22273046 9.63363895  
Si 1.85586228 4.21329840 2.05763589  
Si 2.19636877 14.29940258 7.46250853  
Si 2.22335498 14.29083671 15.01701686  
Si 2.37060921 14.30752252 4.33208686  
45 Si 2.35136400 14.31163276 11.89063849  
Si 2.33277444 8.50820355 7.32828030  
Si 2.28007995 8.49486809 14.92745821  
Si 2.14308628 8.51312455 4.20806302  
Si 2.16051090 8.51450652 11.79938024  
50 Si 3.22410869 11.44835344 8.05495188  
Si 3.22927671 11.43115435 0.47868597  
Si 3.23938666 11.38055283 3.60731175  
Si 3.23675296 11.38403344 11.18138709  
Si 4.13476401 4.18072123 7.41194399  
55 Si 4.13708358 4.17295021 14.98482056  
Si 4.14539455 4.20751086 4.27996637  
Si 4.14765528 4.21947488 11.85191838  
Si 5.08295142 1.27709787 8.11183006

Si 5.10864220 1.27514256 0.52758950  
Si 5.22443842 1.33850153 3.66233639  
Si 5.21487773 1.34303839 11.23237284  
Si 5.15785450 7.08390641 8.02514951  
5 Si 5.11360579 7.07382290 0.46969603  
Si 4.99681957 7.14073564 3.58220005  
Si 5.03423248 7.14765493 11.16079476  
Si 5.50442168 11.40962752 5.84235504  
Si 5.51177359 11.41306896 13.40953955  
10 Si 6.89004450 14.25517006 5.85842975  
Si 6.90821482 14.26346825 13.43857001  
Si 6.82545374 8.51532841 5.82897061

218

15 H-FER(35)\_T2-(Si)<sub>2</sub>-T2 19.147 14.304 15.153  
H 9.61174341 7.15986864 3.62523634  
H 9.61079711 7.15252939 11.19812153  
O 8.32998048 8.29845850 5.49056906  
O 8.32711291 8.28509154 13.06199145  
20 O 8.56247262 14.33771170 5.81370091  
O 8.56565719 14.33729135 13.38817081  
O 10.40960556 12.45821109 5.67252523  
O 10.41752799 12.46211761 13.25840957  
O 10.81069768 9.84244017 5.49089715  
25 O 10.79571227 9.84599650 13.05266985  
O 10.87346956 0.37377270 6.98661719  
O 10.87267414 0.38823518 14.55808469  
O 10.69595721 0.40376521 4.32449830  
O 10.69564688 0.39913628 11.89517711  
30 O 10.63846385 7.40170377 6.97459951  
O 10.64651339 7.40451691 14.54289039  
O 10.44372786 7.34005743 4.10640772  
O 10.44206971 7.33634533 11.67911352  
O 11.68177586 0.65002904 9.46776101  
35 O 11.67890327 0.63961889 1.89216055  
O 11.42731945 6.68630804 1.79666012  
O 11.43538245 6.68050890 9.37352869  
O 11.97406306 5.15233486 7.28742973  
O 11.96676402 5.14658471 14.86855416  
40 O 12.07444894 5.23344580 3.93549641  
O 12.08100202 5.23720545 11.51838201  
O 12.14440666 2.57495824 7.69868128  
O 12.16185835 2.57210482 0.13648845  
O 11.96647186 2.62650205 3.62751317  
45 O 11.95918720 2.63023993 11.21406654  
O 12.48011201 11.36953397 6.90372392  
O 12.48157747 11.34300255 14.47576491  
O 12.40975473 11.53315346 4.23682047  
O 12.40730587 11.53630455 11.81087577  
50 O 13.41522939 3.67280130 5.61125270  
O 13.41802122 3.67325461 13.19206512  
O 13.47921207 0.29422604 7.54889497  
O 13.47399255 0.27867070 15.12234534  
O 13.33401899 0.38198732 3.97437687  
55 O 13.33403178 0.38931200 11.55074427  
O 13.23778188 7.47525199 7.63190068  
O 13.24299013 7.46166570 0.06108185  
O 13.01684052 7.73077357 3.71853936

O 13.01371206 7.73864965 11.29716511  
O 13.33928823 11.13871849 1.80605688  
O 13.34098634 11.12861479 9.38219195  
O 14.30077125 4.11239811 8.03792989  
5 O 14.30487747 4.12968603 0.46364295  
O 14.25256364 3.92606032 3.12901988  
O 14.24802834 3.91691005 10.70433160  
O 14.85912110 12.37003263 7.57527813  
O 14.85828570 12.35751687 15.13566428  
10 O 14.78175215 12.51243987 3.59632411  
O 14.77742526 12.51829246 11.16452832  
O 14.56195354 9.77078163 7.44535639  
O 14.56819767 9.75777079 15.04230482  
O 14.51034359 9.91003961 3.86369950  
15 O 14.51023011 9.91663561 11.44969146  
O 15.28939907 14.15517714 5.65528269  
O 15.28865974 14.15456319 13.22803932  
O 14.89098630 7.90788316 5.57642292  
O 14.88946279 7.90946513 13.15578697  
20 O 16.07570115 0.31727598 8.11375582  
O 16.06879910 0.30369940 0.54050570  
O 15.88012852 0.52803848 3.20695294  
O 15.87841317 0.53341720 10.77998085  
O 15.85289075 7.51185815 7.98036014  
25 O 15.85853945 7.49501159 0.40221046  
O 15.59718888 7.62887433 3.05397707  
O 15.59485538 7.63843333 10.63222421  
O 16.13477546 2.69058483 1.71413509  
O 16.14651309 2.70114579 9.29531474  
30 O 16.15623096 5.30751590 1.91717525  
O 16.13551789 5.31782998 9.48995495  
O 18.14969010 1.01910653 1.98332438  
O 18.15396513 1.02273975 9.56756785  
O 17.95988995 7.21067380 1.93199789  
35 O 17.95377338 7.20643594 9.50667216  
O 0.83089526 2.97924781 9.52584143  
O 0.81985813 2.98166017 1.94961092  
O 0.95059962 5.60083437 9.68788893  
O 0.95538200 5.60286955 2.10422479  
40 O 1.23811268 0.75624482 8.14304895  
O 1.24261249 0.75845671 0.57200561  
O 1.31072148 0.71144739 3.25002843  
O 1.32052144 0.70585068 10.82101676  
O 1.03891106 7.78035321 8.16808272  
45 O 1.04253808 7.78817463 0.59108492  
O 0.91577051 8.01802046 3.26197263  
O 0.90764154 8.01915105 10.83800948  
O 1.86982606 8.20085956 5.71467010  
O 1.87258766 8.19646636 13.28506097  
50 O 1.97555099 0.10901720 5.71718094  
O 1.97179834 0.11270292 13.29493145  
O 2.23867826 12.68812708 7.70222770  
O 2.23840366 12.68879624 0.12635356  
O 2.37688856 12.68509916 3.77053501  
55 O 2.39234328 12.68657517 11.35630760  
O 2.24895364 10.06524680 7.58597223  
O 2.25682046 10.06728986 15.14476046  
O 2.45780319 10.06948400 3.93819030

O 2.45331396 10.07037048 11.50776020  
O 2.66657871 4.30518240 8.12423916  
O 2.66596139 4.29241881 0.54746385  
O 2.85516428 4.11176071 3.20292123  
5 O 2.86055482 4.11830740 10.77950430  
O 3.67724566 11.29453719 9.47479100  
O 3.67129659 11.28893863 1.89750750  
O 3.82503135 0.46015620 7.60007380  
O 3.82728584 0.45696299 0.02241437  
10 O 3.87382587 0.52507876 3.91254914  
O 3.87947678 0.53460280 11.50349574  
O 3.64734182 7.81147167 7.64443830  
O 3.64902389 7.80879072 0.06334585  
O 3.46442655 7.60472726 3.65057931  
15 O 3.45913762 7.60664216 11.21156220  
O 3.65670136 4.11966829 5.69874864  
O 3.65955597 4.12006217 13.27544863  
O 4.46531837 11.42505993 6.97156981  
O 4.47367055 11.43611181 14.55196339  
20 O 4.69822658 11.47002736 4.30804925  
O 4.70407527 11.45024829 11.88769300  
O 4.90484568 2.89770522 7.71286390  
O 4.90892764 2.89264913 0.13477622  
O 5.12477935 2.87227101 3.84913017  
25 O 5.13232545 2.88008989 11.42592731  
O 4.98086686 5.51416866 7.54804626  
O 4.98016351 5.50808936 15.13163054  
O 5.04855801 5.49226483 3.87525771  
O 5.05078852 5.50109846 11.45735741  
30 O 5.56589133 1.07574595 9.51215749  
O 5.57062114 1.07149968 1.93436481  
O 5.46379522 7.25219750 9.50058019  
O 5.45915100 7.25303291 1.92528890  
O 6.38420617 0.80126019 7.02455975  
35 O 6.38636040 0.79422356 14.59912466  
O 6.47846729 0.64820734 4.35979939  
O 6.48577443 0.65381792 11.93399799  
O 6.24312205 7.79686456 7.05585395  
O 6.24467103 7.78523036 14.62949148  
40 O 5.98372433 7.92320399 4.40199742  
O 5.97159291 7.93999361 11.97740520  
O 6.43897969 12.76225009 5.82888231  
O 6.44513795 12.76045444 13.39232971  
O 6.44357086 10.12872673 5.79790450  
45 O 6.45301478 10.12734221 13.39154843  
Al 10.02311170 8.34541021 5.68630199  
Al 10.02066274 8.34313131 13.25653200  
Si 6.76647682 8.53202249 13.27160036  
Si 10.14474098 14.05719415 5.69472107  
50 Si 10.14793860 14.05999671 13.27025422  
Si 11.51610827 11.26599296 5.58246479  
Si 11.51426551 11.26239189 13.15570239  
Si 12.04852208 0.96507280 7.91678159  
Si 12.05071889 0.96203838 0.34344474  
55 Si 11.92255474 1.00016770 3.45601554  
Si 11.92160719 1.00492422 11.03286806  
Si 11.81416908 6.69819795 7.77427594  
Si 11.81332493 6.69541683 0.19861956



Si 11.83435870 6.71213990 3.34508556  
Si 11.83712430 6.71291817 10.92272702  
Si 12.95697967 3.87141000 7.16268185  
Si 12.96084909 3.87342058 14.74399395  
5 Si 12.93701129 3.84941262 4.07030201  
Si 12.93669519 3.84928004 11.65187101  
Si 13.79878212 11.15680375 7.81913991  
Si 13.79959903 11.14615522 0.24349267  
Si 13.75216923 11.26853110 3.37332348  
10 Si 13.75070203 11.27084648 10.94921212  
Si 14.91853352 13.95846850 7.22405201  
Si 14.91518994 13.94825819 14.79522901  
Si 14.81274402 14.06072814 4.10626833  
Si 14.81142249 14.06511310 11.67868048  
15 Si 14.62281087 8.17521827 7.15984349  
Si 14.62651001 8.16500129 14.74188955  
Si 14.52229208 8.30177716 4.04861305  
Si 14.52001125 8.30763925 11.62943150  
Si 15.20579649 4.00431807 1.80938950  
20 Si 15.20098660 4.00368623 9.38516859  
Si 16.55373543 1.13624635 9.43483591  
Si 16.54871283 1.12802656 1.85724125  
Si 16.37759673 6.91998186 9.40031464  
Si 16.38598834 6.91194633 1.82480841  
25 Si 0.61945277 1.36611943 9.51528183  
Si 0.61409538 1.36762738 1.93966011  
Si 0.45503417 7.14157607 9.54465340  
Si 0.46126084 7.14454919 1.96659442  
Si 1.83468189 4.25477649 9.52639180  
30 Si 1.83162094 4.25109142 1.94826638  
Si 2.32472419 14.26229388 7.29047075  
Si 2.32498351 14.26330099 14.86722044  
Si 2.38759289 14.26675425 4.15840341  
Si 2.39452018 14.26893087 11.73907427  
35 Si 2.20737629 8.46649759 7.28140783  
Si 2.21120453 8.46714362 14.85059072  
Si 2.18994025 8.48219676 4.14827640  
Si 2.18663999 8.48264681 11.71814417  
Si 3.16206165 11.36613373 7.93176325  
40 Si 3.16449330 11.36807701 0.35231697  
Si 3.30276440 11.37753616 3.47875841  
Si 3.30883010 11.37487011 11.05674397  
Si 4.05192184 4.20814495 7.27420809  
Si 4.05323610 4.20236092 14.85147651  
45 Si 4.16862512 4.15155733 4.15389113  
Si 4.17340048 4.15758383 11.73147659  
Si 5.16257469 1.31108847 7.95696585  
Si 5.16570603 1.30609361 0.37954122  
Si 5.25297283 1.28368833 3.51190184  
50 Si 5.25714874 1.29031611 11.09133044  
Si 5.07781841 7.09589733 7.92856393  
Si 5.07715099 7.09121173 0.35294011  
Si 4.98845385 7.07058818 3.47031162  
Si 4.98639076 7.07715323 11.04425356  
55 Si 5.50798396 11.44266871 5.72453541  
Si 5.51517282 11.43941205 13.30360153  
Si 6.95291293 14.29977482 5.75525232  
Si 6.95693020 14.29863631 13.32731514

Si 6.76705468 8.53482768 5.69393218

218  
H-FER(35)\_T2-(Si)<sub>3</sub>-T2' 19.147 14.304 15.153

5 H 9.50491850 7.19814914 7.62610588  
H 7.56683280 10.62826831 13.27581385  
O 8.32537605 8.29033478 5.52558592  
O 8.51715803 8.29461153 12.96040384  
O 8.46858690 14.31642540 5.95164461  
10 O 8.47522865 14.27574545 13.47526669  
O 10.39421907 12.53162031 5.68975224  
O 10.37323346 12.48602621 13.26013950  
O 10.71345817 9.91990462 5.86125385  
O 10.54226442 9.89075589 13.46284278  
15 O 10.80652245 0.43916339 7.04409625  
O 10.80952016 0.39174132 14.61519363  
O 10.52648065 0.49244906 4.38126228  
O 10.54698316 0.46068131 11.94614064  
O 10.34821045 7.41927469 7.18455555  
20 O 10.46712371 7.46463806 14.56809214  
O 10.84574811 7.46492390 4.37598462  
O 10.89420789 7.75033030 11.95326300  
O 11.53113098 0.85303198 9.53696963  
O 11.51241355 0.80982233 1.96417407  
25 O 11.44727184 7.07919333 1.82596985  
O 11.45976043 7.01888602 9.51879305  
O 11.92231997 5.29765119 7.54047796  
O 11.86993107 5.27397095 15.07126720  
O 12.13291286 5.28643569 3.65139726  
30 O 11.94755898 5.34458022 11.51539492  
O 12.02074470 2.69441640 7.68557022  
O 11.99315202 2.66454118 0.12187809  
O 11.85347397 2.69643182 3.82409715  
O 11.80725739 2.73086548 11.40655384  
35 O 12.44423836 11.55674254 7.02251006  
O 12.39482265 11.41406483 14.59545901  
O 12.36957136 11.37880282 4.36136996  
O 12.27631292 11.20943268 11.92559178  
O 13.28074581 3.96766266 5.68706532  
40 O 13.30234068 3.89240889 13.29936729  
O 13.39841743 0.43042359 7.70403704  
O 13.38926747 0.40670555 0.13899274  
O 13.16163539 0.39546162 4.02838191  
O 13.16933682 0.46031363 11.61561026  
45 O 12.93917054 7.77936886 7.38774774  
O 13.07233811 7.64259306 14.92377111  
O 13.37589399 7.62094469 3.52447007  
O 13.43767227 7.52269432 11.18935623  
O 13.28576132 11.21854382 1.90737663  
50 O 13.27308940 11.21968785 9.49672136  
O 14.23838023 4.12644437 8.13460844  
O 14.17990338 4.12788150 0.61357182  
O 14.24662455 3.71189737 3.26657471  
O 14.10223443 3.93183300 10.79641270  
55 O 14.80643579 12.51822997 7.72801351  
O 14.75151231 12.47044410 0.05147148  
O 14.67378818 12.57967379 3.73434218  
O 14.54621331 12.54302844 11.43458965

O 14.50666220 9.91173993 7.53292422  
O 14.51585315 9.86310156 15.11591474  
O 14.59499356 9.96694982 3.86985527  
O 14.56257330 9.92747884 11.44384376  
5 O 15.12942650 14.28073602 5.73605253  
O 15.13320275 14.32076228 13.32211815  
O 14.92852971 8.04811868 5.66684335  
O 15.07033619 8.05162705 13.25095364  
O 16.01666334 0.48153045 8.14937753  
10 O 16.00786865 0.37817019 0.61501658  
O 15.71065597 0.62596854 3.26341448  
O 15.70020557 0.49643272 10.80726949  
O 15.46504463 7.52333051 8.19168355  
O 15.59597352 7.53662153 0.62330407  
15 O 15.98854967 7.78830508 3.26528884  
O 16.01452267 7.80526900 10.79787463  
O 16.16661087 2.77455929 1.74471556  
O 16.08674059 2.77241956 9.48714605  
O 15.95946365 5.37908694 2.12114870  
20 O 15.99660951 5.39194233 9.65987390  
O 18.06702349 0.99427930 2.14145719  
O 18.04323763 1.01323338 9.76390918  
O 17.94599807 7.05105477 1.67368017  
O 17.91342171 7.13342350 9.11468668  
25 O 0.77059788 2.88579623 9.46653082  
O 0.79510628 2.88506030 1.82574471  
O 0.82955262 5.50724893 9.60775488  
O 0.94875136 5.51321353 2.03154816  
O 0.97272639 0.58542593 8.14549771  
30 O 1.05320604 0.51736644 0.62059292  
O 1.30952067 0.72293725 3.27439942  
O 1.33066039 0.64937275 10.79226346  
O 1.17289999 7.71854646 8.18743917  
O 1.09229292 7.74220326 0.57011432  
35 O 0.80164595 7.89178174 3.22053783  
O 0.70077238 7.89774246 10.80978604  
O 1.62234280 8.33497267 5.68104348  
O 1.71734838 8.24666185 13.22914921  
O 1.92161511 0.09208264 5.74710041  
40 O 1.91745112 0.16808869 13.31275006  
O 2.16866177 12.61582417 7.67755893  
O 2.32038382 12.61584022 15.12149538  
O 2.32773627 12.67748000 3.78685489  
O 2.37706926 12.65045641 11.47686531  
45 O 2.36085658 10.00414643 7.60996948  
O 2.34386878 9.99979953 15.12411060  
O 2.23623364 10.05562601 3.75819008  
O 2.20574525 10.03281909 11.33405226  
O 2.67829876 4.21809553 8.19541152  
50 O 2.71732992 4.20150190 0.56533421  
O 2.74895489 3.98348080 3.23156846  
O 2.66272362 4.07378937 10.87182903  
O 3.64668740 11.35508194 9.50984228  
O 3.65183728 11.32925796 1.90250948  
55 O 3.60013196 0.49540274 7.78931717  
O 3.66597589 0.53727824 0.14654811  
O 3.86106087 0.48586161 3.99097607  
O 3.88211635 0.47780260 11.56433236

O 3.66233847 7.71137968 7.24716680  
O 3.63947729 7.68614077 14.97773164  
O 3.37058219 7.63854804 3.80228208  
O 3.28558521 7.59564447 11.15902930  
5 O 3.55918520 4.08586285 5.72437737  
O 3.67416621 4.17532245 13.28472291  
O 4.50532375 11.51242643 7.03571220  
O 4.61131529 11.32519321 14.62726188  
O 4.53436225 11.28390682 4.37316582  
10 O 4.54238518 11.16019895 11.96237761  
O 4.89351733 2.80849117 7.64996959  
O 4.96450885 2.85451840 0.05833897  
O 5.06840802 2.86258354 3.89884041  
O 4.99649886 2.89824332 11.35596381  
15 O 4.97366591 5.41973435 7.55821555  
O 5.03033208 5.45644360 0.05403524  
O 4.88810214 5.47719804 3.86233235  
O 4.89070928 5.50376270 11.29902566  
O 5.51775598 1.03556860 9.53173484  
20 O 5.50405164 1.07942617 1.97431267  
O 5.21943788 7.32501726 9.39623851  
O 5.21281590 7.30506732 1.94588102  
O 6.15367841 0.55291991 7.03512734  
O 6.24198536 0.61700564 14.65637239  
25 O 6.46695578 0.66028296 4.38435308  
O 6.47285998 0.80481450 11.97899957  
O 6.30319165 7.64966754 7.04136375  
O 6.28149783 7.76647668 14.73702298  
O 5.95773501 7.84577123 4.39799565  
30 O 5.83892040 7.92694631 11.88180298  
O 6.42973052 12.65242553 5.63126200  
O 6.32013032 12.78866453 13.15188448  
O 6.34656895 10.02774006 5.84457696  
O 6.66520915 10.24766958 13.29734611  
35 Al 10.02620230 8.39063243 5.54855893  
Al 6.82660956 8.33513670 13.21643028  
Si 10.08282810 8.33523943 13.24348094  
Si 10.05981693 14.11207648 5.76362502  
Si 10.07394992 14.08511433 13.32594755  
40 Si 11.46988877 11.31192574 5.72874241  
Si 11.41753330 11.23881915 13.31012281  
Si 11.94279406 1.09239752 7.98215128  
Si 11.93189432 1.06717693 0.41729662  
Si 11.77454472 1.09540742 3.54353913  
45 Si 11.77355432 1.12703765 11.11803735  
Si 11.75787627 6.84682541 7.94739629  
Si 11.72205752 6.86313549 0.24866372  
Si 11.92695579 6.88001028 3.37066146  
Si 11.94203302 6.90846932 11.08033327  
50 Si 12.87927253 3.99925322 7.25477213  
Si 12.83814599 3.99033684 14.86059387  
Si 12.87291553 3.93069967 4.10689546  
Si 12.79572690 3.97575594 11.75677864  
Si 13.74839361 11.29615667 7.93970472  
55 Si 13.73597836 11.23397892 0.34680770  
Si 13.72179378 11.28109944 3.47640604  
Si 13.66353126 11.22796115 11.07430410  
Si 14.82781381 14.09779275 7.32022256

Si 14.81136204 14.06805534 14.89562536  
Si 14.66672799 14.14452317 4.18306914  
Si 14.63667619 14.12783546 11.78812146  
Si 14.47999621 8.32631134 7.19672449  
5 Si 14.56038016 8.27271199 14.78217366  
Si 14.70382748 8.35879328 4.08120302  
Si 14.76309761 8.33432268 11.68377259  
Si 15.12911108 4.00572165 1.93183616  
Si 15.10022919 4.05276441 9.51931573  
10 Si 16.45292381 1.18953942 9.54868694  
Si 16.47601042 1.19055809 1.94564818  
Si 16.34331515 6.96407978 9.44190137  
Si 16.36066653 6.93971971 1.92426605  
Si 0.51130683 1.28539376 9.54059911  
15 Si 0.53674160 1.28488678 1.96266515  
Si 0.38933028 7.06120335 9.44112117  
Si 0.43491787 7.04533749 1.87806796  
Si 1.74839232 4.17795736 9.53163823  
Si 1.81016989 4.15101413 1.91362921  
20 Si 2.17425013 14.20848024 7.33258070  
Si 2.24129712 14.22541437 14.87964308  
Si 2.35666053 14.25397185 4.19421764  
Si 2.37301146 14.25317478 11.77410550  
Si 2.21201277 8.44054899 7.19036658  
25 Si 2.21143438 8.41086095 14.76886904  
Si 2.02158382 8.48068615 4.11296385  
Si 1.99177355 8.44213280 11.64168723  
Si 3.17377571 11.36356841 7.94857053  
Si 3.21386156 11.31252559 0.34136353  
30 Si 3.19006476 11.33472936 3.46662953  
Si 3.17619788 11.29929152 11.06150137  
Si 4.02217240 4.13214805 7.28442838  
Si 4.09574685 4.18342560 14.85477375  
Si 4.06462639 4.11408642 4.17535390  
35 Si 4.05444752 4.17753582 11.70559400  
Si 5.03762443 1.22530719 7.98813001  
Si 5.08258482 1.28178099 0.42264264  
Si 5.21478019 1.27900162 3.56022680  
Si 5.20053877 1.31295859 11.09833027  
40 Si 5.02628361 7.02781714 7.81967825  
Si 5.06353388 7.06637558 0.34477199  
Si 4.86414774 7.06836341 3.50499116  
Si 4.83177993 7.10400355 10.96252515  
Si 5.45294513 11.36228690 5.71776773  
45 Si 5.45075735 11.44346149 13.25930707  
Si 6.87184144 14.21096658 5.74919472  
Si 6.87522168 14.32192424 13.31494786  
Si 6.75012514 8.45437305 5.68332663

50 218

H-FER(35)\_T4-(Si)<sub>2</sub>-T4 19.147 14.304 15.153  
H 7.44207621 3.38741001 3.61622058  
H 7.46869038 10.68809290 3.81601101  
O 18.92507572 4.06859045 3.45948404  
55 O 18.87019820 10.08845193 3.97487012  
O 1.65787733 8.35840607 3.49163160  
O 1.73553371 5.76858244 4.00385870  
O 2.08390913 10.44230341 5.07650077

O 1.72326705 10.81509006 2.44066257  
O 1.75367675 3.29295353 4.99642730  
O 2.14298716 3.72037447 2.37061994  
O 2.77637499 11.03518185 7.54046399  
5 O 2.68881127 3.01968077 7.43672050  
O 3.01069779 1.05905925 5.67885842  
O 3.17770894 1.32944354 1.86414198  
O 3.20395964 12.79446801 5.56792975  
O 2.98838730 13.05944435 1.80713703  
10 O 3.57295584 7.40211334 5.03088197  
O 3.53623811 6.82916965 2.39336730  
O 4.49277806 14.22785945 3.72042102  
O 4.67394863 10.64587424 5.73486947  
O 4.37219910 10.84438850 2.12404040  
15 O 4.39698130 3.26826371 5.35815064  
O 4.70663799 3.43385705 1.65307035  
O 4.51792543 7.16488478 7.47775547  
O 5.39929018 14.21522820 6.19080812  
O 5.36628475 14.19627779 1.23709250  
20 O 5.98775994 8.34882982 5.60429039  
O 5.70429795 8.35456366 1.93209730  
O 5.67443341 5.78721121 5.45875286  
O 5.92377988 5.78132814 1.89804933  
O 6.57322107 10.30224166 3.88301067  
25 O 6.56061492 3.80484787 3.55441445  
O 7.30358433 10.53819495 6.34802829  
O 7.21036271 10.74152681 1.31121714  
O 7.23587029 3.44207298 6.12749591  
O 7.32911120 3.66370866 1.09118071  
30 O 7.26466953 12.88562740 7.52948277  
O 7.37626676 1.18436623 7.50078663  
O 9.36569625 11.27081250 7.78224447  
O 9.43632824 2.83084125 7.42878043  
O 11.35435260 12.93591113 7.36853638  
35 O 11.51584252 1.24488526 7.70248005  
O 11.35419419 10.53978613 6.20240639  
O 11.60686556 10.61667890 1.30725687  
O 11.67963355 3.39281757 6.14434004  
O 11.39670150 3.49997131 1.25151298  
40 O 12.36899697 3.91343909 3.66490290  
O 12.33120480 10.13759471 3.78659012  
O 12.70656060 8.31723738 5.69360698  
O 12.87163966 8.35873602 1.88215868  
O 12.85845976 5.70146661 5.57738935  
45 O 12.71887592 5.74293649 1.75946896  
O 13.27691872 0.00436063 6.17755361  
O 13.27718642 14.27359522 1.28709973  
O 14.15306676 7.00447477 7.51892713  
O 13.97559163 10.65692067 5.83391324  
50 O 14.19608747 10.66117430 1.97845789  
O 14.26592996 3.45356096 5.45791643  
O 14.02344275 3.42723231 1.61651411  
O 14.21076280 14.17786438 3.73203309  
O 15.02823604 7.18179332 5.05111053  
55 O 15.04278600 6.87968183 2.39689745  
O 15.46321635 12.84808596 5.68250086  
O 15.53918603 12.94552923 1.76819542  
O 15.60859336 1.16335413 5.61782455

O 15.54197046 1.26517872 1.87100330  
O 15.92853206 11.04052724 7.58099420  
O 15.97383048 3.04066446 7.46657453  
O 16.53127459 10.51115868 5.08066910  
5 O 16.82067150 10.73689687 2.42493597  
O 16.89045711 3.38801754 5.01778239  
O 16.57758237 3.64036662 2.36644661  
O 16.89520697 8.36449102 3.58439945  
O 16.94722089 5.77499641 3.87833705  
10 O 18.97174807 4.07129113 11.11393308  
O 18.99321003 10.08951298 11.50131484  
O 1.84582111 8.39242416 11.16477553  
O 1.80004019 5.79582867 11.44435843  
O 2.14046705 10.54097442 12.68328728  
15 O 1.89992541 10.77660875 10.01853272  
O 1.88515814 3.41343503 12.59576490  
O 2.12878086 3.64925910 9.93029343  
O 2.69654827 11.11694618 0.02162262  
O 2.76388984 3.09077666 15.06147928  
20 O 3.14843602 1.19127911 13.23901323  
O 3.19268615 1.29343214 9.41668932  
O 3.22882331 12.87325950 13.25101460  
O 3.17955403 12.97258280 9.31142534  
O 3.70742249 7.20973349 12.63400833  
25 O 3.70132429 6.91259224 9.97387635  
O 4.47400889 14.20440690 11.30127399  
O 4.67682771 10.66420792 13.49804595  
O 4.51188292 10.68065125 9.52470665  
O 4.49990571 3.47664772 13.08012669  
30 O 4.66822948 3.48033409 9.12999761  
O 4.51856868 6.94036099 15.12834377  
O 5.46164090 14.26841894 13.72884639  
O 5.45725837 14.27951225 8.87082291  
O 5.98973165 8.35640828 13.40150856  
35 O 5.85940693 8.39206872 9.43477035  
O 5.87925227 5.74477219 13.16791231  
O 5.99464445 5.77927645 9.22364460  
O 6.26911605 10.11660424 11.42826606  
O 6.28124145 4.00568594 11.18739688  
40 O 7.30979355 10.62971979 13.79064393  
O 7.12092957 10.67570676 9.01485626  
O 7.10754763 3.44098398 13.60733208  
O 7.30307893 3.50181005 8.81937405  
O 7.34330146 12.97190375 15.06364113  
45 O 7.26704997 1.27470618 15.16190419  
O 9.42128031 11.35295199 0.01571751  
O 9.36985426 2.87707711 14.83470964  
O 11.58528802 12.83710643 15.02606421  
O 11.31968022 1.15288852 15.14719817  
50 O 11.49572879 10.49177938 13.80667551  
O 11.71461337 10.76409105 8.85109254  
O 11.71213283 3.38549221 13.76362378  
O 11.52062293 3.65339494 8.80291689  
O 12.37942270 3.89681083 11.28167217  
55 O 12.30538803 10.14057174 11.32936224  
O 12.78980356 8.28399155 13.16415347  
O 12.83204594 8.42866557 9.34616118  
O 12.88374936 5.67874388 13.20385342

O 12.84001266 5.82318843 9.52307093  
O 13.32337506 0.09716934 13.77588476  
O 13.30194823 13.95558641 8.84213831  
O 14.15803794 7.05821186 15.10176255  
5 O 14.09911331 10.59100426 13.24825847  
O 14.26667964 10.64238535 9.63046113  
O 14.28364785 3.43212236 13.05840614  
O 14.12626880 3.50962904 9.30361762  
O 14.20265878 14.20158240 11.30393978  
10 O 15.10471870 7.05916248 12.64872121  
O 15.10285293 7.16566277 9.96829194  
O 15.45665425 12.86606726 13.25657321  
O 15.65493537 12.89661186 9.47958938  
O 15.67213333 1.17445957 13.14306764  
15 O 15.43724551 1.20338495 9.31370611  
O 15.90643860 11.03129413 15.13580492  
O 15.98784154 2.99861470 15.06180661  
O 16.70021508 10.61453103 12.66648329  
O 16.89629204 10.62025605 9.99242600  
20 O 16.90691119 3.45855342 12.63781120  
O 16.70606269 3.42439150 9.96562236  
O 17.03114900 8.33599288 11.35020057  
O 16.92100419 5.72714032 11.25671582  
Al 5.88641835 4.10326983 5.30367552  
25 Al 5.88020047 10.03922903 2.13460585  
Si 6.08690003 9.93843428 5.48247664  
Si 4.91247730 7.03153807 1.54354602  
Si 1.30983810 9.92827553 3.73608028  
Si 1.36349178 4.21183872 3.71665581  
30 Si 2.64073683 7.08827282 3.73010578  
Si 3.16273231 11.23104937 5.97581802  
Si 2.97561187 11.43566571 1.60112668  
Si 2.99242649 2.68480635 5.86521680  
Si 3.17313002 2.89253365 1.44938008  
35 Si 4.03646128 14.16299723 5.28841425  
Si 4.01630514 14.26226993 2.15747956  
Si 4.92825999 7.12085269 5.89433785  
Si 6.08185510 4.19517115 1.95924608  
Si 6.35481021 14.23072766 7.51551970  
40 Si 7.76136947 11.35905744 7.69453912  
Si 7.81857979 2.75598946 7.45523854  
Si 10.96174488 11.37232379 7.55176794  
Si 11.03808106 2.78427840 7.51502051  
Si 12.37292323 14.18578049 7.52497782  
45 Si 12.60580981 9.91038032 5.37295456  
Si 12.75821071 9.94464763 2.22783555  
Si 12.79899790 4.11342803 5.22212264  
Si 12.64033807 4.14732425 2.07882666  
Si 13.68905231 7.04630549 5.95955390  
50 Si 13.69987090 7.01549801 1.49267927  
Si 14.63888325 14.19335569 5.30100869  
Si 14.64215230 14.23829926 2.16517593  
Si 15.47345533 11.26194593 6.03811553  
Si 15.60934098 11.33831511 1.53290414  
55 Si 15.67739353 2.76533014 5.89301880  
Si 15.53037165 2.83497340 1.44141576  
Si 15.96767531 7.05051921 3.72728088  
Si 17.28012667 9.92961879 3.76314871



Si 17.33511457 4.21138036 3.68416282  
Si 1.43969477 9.95244540 11.34533284  
Si 1.41661586 4.22873291 11.26686318  
Si 2.77686597 7.07777916 11.30435475  
5 Si 3.18637188 11.29728515 13.65803626  
Si 3.09726889 11.36369410 9.10106092  
Si 3.08125206 2.79486124 13.49319069  
Si 3.17095942 2.86199837 8.97547605  
Si 4.07818508 14.20352220 12.87821575  
10 Si 4.07563209 14.26391600 9.72596252  
Si 6.05660082 9.94226172 13.02931033  
Si 5.92974105 9.96041922 9.85490387  
Si 5.93229053 4.17206398 12.75783628  
Si 6.05678621 4.19111631 9.58912021  
15 Si 6.34110666 14.23426290 15.09693102  
Si 7.80274682 11.40673608 15.14653675  
Si 7.76618229 2.79457451 14.93721667  
Si 11.02538713 11.32011202 15.12535270  
Si 10.96572975 2.73349224 15.04470138  
20 Si 12.38728021 14.23191467 15.09750229  
Si 12.68141065 9.88277187 12.88904784  
Si 12.78584187 9.99431031 9.78446587  
Si 12.82165643 4.09875136 12.83156087  
Si 12.72447494 4.21501024 9.72639585  
25 Si 13.73987014 7.01896334 13.52871012  
Si 13.73760825 7.10398517 9.08982339  
Si 14.66016084 14.22406319 12.86718241  
Si 14.64671091 14.14668259 9.73791677  
Si 15.53656283 11.27418686 13.57201891  
30 Si 15.68005648 11.29861704 9.16511663  
Si 15.70643834 2.76794418 13.47951468  
Si 15.55792490 2.79650526 9.01858422  
Si 16.02704404 7.06999227 11.30635802  
Si 17.39618092 9.91716363 11.37452690  
35 Si 17.36949966 4.17037269 11.24713635  
Si 5.01842516 7.06399721 13.58566147  
Si 5.01328591 7.06218176 9.02379186

218

40 H-FER(35)\_T3-(Si)<sub>1</sub>-T3 19.147 14.304 15.153  
H 2.66884499 7.31726039 5.99918994  
H 6.04906064 8.27618892 3.43895168  
O 18.94232351 3.84483188 3.59221782  
O 18.90650688 10.23015082 3.84194563  
45 O 1.58429609 8.37788997 3.56124794  
O 1.54844934 5.78008148 3.79463682  
O 2.08212665 10.47130135 5.07982715  
O 1.92726799 10.76489367 2.42491327  
O 1.96620091 3.49975457 5.06074929  
50 O 2.13239965 3.59528645 2.39038536  
O 2.62455274 11.25175447 7.51960502  
O 2.81531605 3.09582180 7.49663490  
O 3.07149144 1.17087618 5.66233870  
O 3.21417921 1.25839451 1.76553587  
55 O 3.14423762 12.87148777 5.44577602  
O 3.31340581 12.93997503 1.84165780  
O 3.27928248 7.20333625 5.24433136  
O 3.68956654 6.95661351 2.64371473

O 4.55789097 0.04327242 3.73213817  
O 4.61807885 10.71248083 5.88072812  
O 4.48453859 10.55104781 1.71753491  
O 4.59886996 3.31279307 5.52860795  
5 O 4.71322446 3.44595343 1.70384319  
O 4.69037171 7.34824538 7.55598222  
O 5.34703711 14.17680370 6.22865872  
O 5.54135568 0.01705713 1.29459923  
O 5.86004235 8.49510586 5.06988352  
10 O 5.98087482 8.45913052 2.43205494  
O 5.75229574 5.69480917 5.34689184  
O 6.12939038 5.68659305 1.87141942  
O 6.24249508 10.71370976 3.74069595  
O 6.45473144 3.72800153 3.69169692  
15 O 7.23859731 10.53284277 6.19818840  
O 7.10635620 10.54450895 1.20767345  
O 7.14321478 3.60177461 6.22315252  
O 7.32730292 3.39171185 1.25906641  
O 7.37039260 12.92884060 7.37245402  
20 O 7.27055999 1.25434883 7.46004129  
O 9.35482975 11.20245258 7.61389709  
O 9.35516694 2.87539990 7.44248008  
O 11.41237245 12.84474184 7.37715319  
O 11.36404711 1.16980239 7.51213988  
25 O 11.43389015 10.45481608 6.19525741  
O 11.58807237 10.52613119 1.23526493  
O 11.58909007 3.46366473 6.17476063  
O 11.45520959 3.53872874 1.23525594  
O 12.36294118 3.84311099 3.69268614  
30 O 12.30080532 10.13520737 3.73300265  
O 12.84063856 8.29340355 5.57085704  
O 12.89324327 8.31721250 1.88683238  
O 12.88828149 5.68849979 5.53784920  
O 12.84064958 5.71463567 1.87000060  
35 O 13.28538957 14.25978472 6.15822481  
O 13.27989949 14.16655117 1.26124642  
O 14.18941138 6.99235539 7.47700167  
O 14.02498968 10.66622494 5.69487294  
O 14.15728712 10.64717611 1.91136446  
40 O 14.18052488 3.38108715 5.57237301  
O 14.06130844 3.36900391 1.69235468  
O 14.21647715 14.14158025 3.70858206  
O 15.14610168 7.04680383 5.03856550  
O 15.15356131 6.96855234 2.37255624  
45 O 15.50864801 12.85429840 5.66377229  
O 15.56438798 12.88347382 1.77271015  
O 15.60722610 1.15432714 5.58176006  
O 15.54663522 1.18626583 1.81321696  
O 15.90003492 11.00488887 7.53813833  
50 O 15.97913005 2.97183967 7.49484963  
O 16.60748495 10.53548237 5.05421941  
O 16.77362879 10.61693841 2.36941343  
O 16.79292488 3.44831616 5.04990145  
O 16.63937538 3.52031565 2.37072650  
55 O 17.04316161 8.32707764 3.67476323  
O 17.07219883 5.73408668 3.74704595  
O 18.95689277 4.10740377 11.18418452  
O 18.94038943 10.02941154 11.40059763

O 1.82403874 8.36093397 11.18337785  
O 1.85488500 5.75690778 11.36231731  
O 2.04196167 10.56692773 12.64076244  
O 1.88666425 10.72732430 9.97737460  
5 O 1.89814531 3.41966449 12.62996548  
O 2.03992170 3.50020916 9.96244667  
O 2.63936875 11.21507464 15.10395000  
O 2.79522524 3.11806179 15.07537543  
O 3.24365688 1.23065045 13.26374563  
10 O 3.34058855 1.27330470 9.35423151  
O 3.16414987 12.91157954 13.11421833  
O 3.21495020 12.95805449 9.46720627  
O 3.63935465 7.17504261 12.72001426  
O 3.77536379 6.99159360 10.03053047  
15 O 4.59658096 14.28225469 11.32562980  
O 4.60366601 10.69427563 13.41255075  
O 4.46833497 10.60745805 9.31972231  
O 4.51824261 3.55330282 13.07822637  
O 4.63291178 3.59466574 9.37205305  
20 O 4.75614968 7.41744201 15.13542544  
O 5.44253445 14.10493961 13.80152613  
O 5.54616617 14.12200478 8.88748973  
O 5.96133671 8.43899766 12.99592146  
O 5.97732307 8.44422962 9.61117903  
25 O 5.87247431 5.83467641 13.26852865  
O 6.05551794 5.83640250 9.29135694  
O 6.22389564 10.47875961 11.30883003  
O 6.39286914 4.11286064 11.29889466  
O 7.23621254 10.65770157 13.71889220  
30 O 7.08695286 10.73688686 8.85314324  
O 7.09705838 3.54412823 13.75885575  
O 7.24568540 3.49713437 8.89276700  
O 7.35452239 12.89243822 0.00211905  
O 7.39430378 1.19537746 14.94606537  
35 O 9.35648467 11.16635556 0.02659432  
O 9.39416209 2.91451439 14.86652982  
O 11.38209380 12.85649875 15.13838441  
O 11.36018461 1.17779962 0.00243283  
O 11.47135018 10.60787578 13.73173840  
40 O 11.60968183 10.65407030 8.85690650  
O 11.72115448 3.37496943 13.74902398  
O 11.50854964 3.45986912 8.84476159  
O 12.37594122 3.93127684 11.27343129  
O 12.29468948 10.03668178 11.30886614  
45 O 12.72096999 8.31991953 13.30356546  
O 12.81204642 8.34432908 9.31806743  
O 12.82276610 5.71459069 13.19875292  
O 12.76148365 5.73503002 9.35309668  
O 13.21280946 14.19148370 13.75533644  
50 O 13.23342686 14.11825723 8.83139699  
O 14.17348825 7.00108393 15.11283252  
O 14.07939996 10.59368645 13.20037077  
O 14.19033019 10.59441498 9.54558847  
O 14.29138025 3.51925657 13.05588796  
55 O 14.12845579 3.46933656 9.32361841  
O 14.13812612 14.14664439 11.29783908  
O 15.01808354 7.14092322 12.63138124  
O 15.03799127 6.99907574 9.96065286

O 15.46564230 12.84510287 13.22032599  
O 15.52889630 12.87428604 9.40123956  
O 15.50135926 1.15774254 13.19222319  
O 15.46941310 1.18709080 9.40457902  
5 O 15.89674689 10.99833279 15.09285898  
O 15.96834964 2.98816147 15.06239543  
O 16.68156602 10.56325498 12.63229695  
O 16.81616454 10.62811313 9.96390141  
O 16.89751156 3.33702875 12.62841405  
10 O 16.72030021 3.45284000 9.96190279  
O 16.94991911 8.30522009 11.25038852  
O 16.85071882 5.68798020 11.38506285  
Al 5.06571185 7.15099779 5.88894455  
Al 5.08340732 7.01843782 1.60342911  
15 Si 5.99270407 10.11431272 5.25634876  
Si 5.95385609 10.14789145 2.24404176  
Si 1.34035930 9.98137805 3.71827444  
Si 1.37065201 4.15723491 3.70225262  
Si 2.51440881 7.06516039 3.68828942  
20 Si 3.11798015 11.33945121 5.97863666  
Si 3.09067303 11.37830699 1.47886920  
Si 3.12955113 2.77792312 5.93468339  
Si 3.23102025 2.86039679 1.44941365  
Si 4.04005856 14.22197145 5.26990341  
25 Si 4.16048986 14.29266959 2.15419718  
Si 5.98818877 4.11545186 5.20047881  
Si 6.15443098 4.10538868 2.13448443  
Si 6.37690138 14.20504029 7.48835941  
Si 7.75390824 11.35814434 7.51397785  
30 Si 7.74175912 2.81074576 7.50106954  
Si 10.96139623 11.29187041 7.51045720  
Si 10.95838791 2.74307594 7.49099274  
Si 12.33228005 14.17218105 7.47439942  
Si 12.65700098 9.88468294 5.29844709  
35 Si 12.73914054 9.90587684 2.18532500  
Si 12.75645197 4.09297717 5.24958376  
Si 12.68275592 4.11578179 2.12332285  
Si 13.76842119 7.00268287 5.90489812  
Si 13.76789136 7.00023726 1.51846485  
40 Si 14.64596557 14.17454146 5.27695355  
Si 14.64414060 14.17045320 2.13964427  
Si 15.50596476 11.26296783 5.98506063  
Si 15.58994892 11.28445001 1.49021585  
Si 15.63081268 2.74275332 5.92678997  
45 Si 15.54969486 2.76908113 1.44511190  
Si 16.08619672 7.01859743 3.70763842  
Si 17.32016490 9.92567407 3.73248291  
Si 17.35412181 4.13499324 3.68973065  
Si 1.39354356 9.91798371 11.30095796  
50 Si 1.41181175 4.20043169 11.28771001  
Si 2.80019317 7.07210960 11.33100712  
Si 3.12218268 11.34486975 13.55380799  
Si 3.06353610 11.38617369 9.08239051  
Si 3.12762178 2.83579099 13.51063406  
55 Si 3.21936445 2.86783192 9.05475856  
Si 4.11255019 14.21258512 12.87700036  
Si 4.17588807 14.23772656 9.75595059  
Si 5.99626620 10.05338502 12.86007788

Si 5.93531622 10.05912804 9.76602810  
Si 5.96536525 4.26915978 12.85882224  
Si 6.07646035 4.26579129 9.71480402  
Si 6.42052432 14.21272137 15.09454911  
5 Si 7.76034079 11.32896269 15.09647594  
Si 7.78979464 2.77285764 15.00793175  
Si 10.96279965 11.29133036 15.11640792  
Si 10.98449598 2.75330370 15.05499157  
Si 12.31980141 14.17409623 15.11855626  
10 Si 12.65019572 9.88997811 12.88457498  
Si 12.73156677 9.90903882 9.75158886  
Si 12.80433273 4.13196947 12.82553732  
Si 12.69947909 4.14590600 9.69802675  
Si 13.68877492 7.03946988 13.55920455  
15 Si 13.70480074 7.01788869 9.03157947  
Si 14.57471345 14.15823270 12.86642112  
Si 14.58691947 14.15790111 9.73254064  
Si 15.52682915 11.24972520 13.53065191  
Si 15.60080631 11.27523882 9.11208020  
20 Si 15.65532930 2.74889656 13.48702469  
Si 15.56911917 2.77173040 9.05366676  
Si 15.95522517 7.02977773 11.30577704  
Si 17.33883159 9.88058120 11.31214752  
Si 17.35109533 4.14722769 11.29016063  
25 Si 5.04278682 7.20804896 13.56724347  
Si 5.11024707 7.15497284 9.10273655

218

H-FER(35)\_T3-(Si)<sub>1</sub>-T4 19.147 14.304 15.153  
30 H 6.06570432 6.01291823 4.08287572  
H 7.37718682 10.90380467 3.74908481  
O 18.95977719 3.91926588 3.57356233  
O 18.84819391 10.14739127 3.98167325  
O 1.63990301 8.42962110 3.47144376  
35 O 1.60869489 5.82372034 3.69772610  
O 2.07926456 10.56355082 5.00674443  
O 1.64794316 10.85642092 2.37258019  
O 1.98150944 3.52550409 5.01941542  
O 2.13342224 3.58753471 2.36811995  
40 O 2.76620758 11.10417508 7.48704798  
O 2.69514786 2.93443700 7.48872583  
O 3.30413923 1.26972244 5.50319911  
O 3.32762363 1.28990195 1.85485744  
O 3.11700733 12.94859431 5.58889087  
45 O 3.02686984 13.01975876 1.76637984  
O 3.51647623 7.20514626 4.91826640  
O 3.48947528 6.96789300 2.23992694  
O 4.58535284 14.10994967 3.67230286  
O 4.66265460 10.81888514 5.65496149  
50 O 4.29469541 10.71497530 2.09748384  
O 4.54877517 3.59869209 5.72593727  
O 4.66290077 3.52108279 1.48726058  
O 4.69371039 6.74662657 7.54965016  
O 5.45821569 14.10710092 6.14922245  
55 O 5.43216816 14.04307705 1.19054889  
O 5.97400420 8.48519745 5.61043080  
O 5.80897106 8.31727782 1.92645055  
O 5.93133494 5.76699775 5.04662435

O 5.86062857 5.75819293 2.27821864  
O 6.55369999 10.38390187 3.82146426  
O 6.26826780 3.57565533 3.65011144  
O 7.26982679 10.74562137 6.27227430  
5 O 7.10117054 10.81615071 1.21757174  
O 7.17423243 3.67602844 6.17014834  
O 7.29175072 3.74277813 1.20875711  
O 7.36397729 12.99420694 7.64472034  
O 7.29276841 1.29562960 7.33474671  
10 O 9.37306925 11.27665561 7.75632948  
O 9.37835711 2.92809910 7.37137516  
O 11.41915597 12.88632024 7.35107470  
O 11.35608838 1.20021685 7.60635563  
O 11.34966477 10.47730637 6.20887916  
15 O 11.57127315 10.56448641 1.28754978  
O 11.66063059 3.42790840 6.17973221  
O 11.45946692 3.49955889 1.27123779  
O 12.38225907 3.88466900 3.69936919  
O 12.31602150 10.15932327 3.77573036  
20 O 12.79669760 8.32285887 5.63716554  
O 12.88830576 8.35016203 1.91303870  
O 12.85282012 5.71413759 5.57579231  
O 12.74317516 5.74545840 1.82918188  
O 13.27892345 0.06694514 6.18940810  
25 O 13.25463078 14.29249961 1.30152995  
O 14.16683451 7.00161291 7.51472742  
O 13.94881548 10.71458838 5.82359618  
O 14.16126047 10.67453012 1.94178831  
O 14.24537710 3.45773068 5.53590216  
30 O 14.07924770 3.45488675 1.68064230  
O 14.20307006 14.15068483 3.74005346  
O 15.09710812 7.08174178 5.06461614  
O 15.08219854 6.88764597 2.40313614  
O 15.46101254 12.87896062 5.72523781  
35 O 15.51762589 12.93858067 1.75173697  
O 15.61512287 1.18285905 5.58337829  
O 15.53706358 1.24756840 1.88712404  
O 15.91355189 11.02423350 7.57608668  
O 15.98314855 2.99574587 7.50008784  
40 O 16.49558465 10.53242100 5.06541194  
O 16.78542905 10.71416517 2.41354823  
O 16.85877957 3.44376791 5.06233919  
O 16.64749713 3.58054832 2.38476091  
O 16.92128185 8.36350700 3.61998056  
45 O 17.04235448 5.76758134 3.80820773  
O 18.93997286 4.11605456 11.15107184  
O 18.99797104 10.03704592 11.42320135  
O 1.95003130 8.44349554 11.31179975  
O 1.79288149 5.82994757 11.42784858  
50 O 2.07740900 10.75604215 12.60733299  
O 1.90890810 10.73410245 9.94642069  
O 1.87492087 3.44206988 12.59229579  
O 2.06979723 3.65260238 9.93293578  
O 2.69222229 11.09547148 15.13752986  
55 O 2.66071745 2.95154132 15.04374323  
O 3.18969601 1.21160681 13.10262792  
O 3.18287707 1.28671415 9.52618618  
O 3.41979695 12.90922643 13.33540873

O 3.24251462 12.95447113 9.32970255  
O 3.73275688 7.08954758 12.73509940  
O 3.74420613 6.97484042 10.04156856  
O 4.59848495 14.15669743 11.28941732  
5 O 4.61578052 10.54291403 13.39705518  
O 4.51232525 10.62046125 9.43729752  
O 4.46805264 3.54782269 13.18349172  
O 4.63516018 3.49972358 9.20030237  
O 4.80691404 6.72757690 15.14995890  
10 O 5.56198923 0.17236650 13.72154951  
O 5.44468837 0.09162681 8.81414864  
O 6.02577706 8.30775514 13.36389143  
O 5.90379431 8.35360132 9.32489230  
O 5.99566070 5.70120080 13.01912235  
15 O 6.04803953 5.73835713 9.59118294  
O 6.25472743 10.04820132 11.35495295  
O 6.30349445 3.70413217 11.27206146  
O 7.26019589 10.63491116 13.70860557  
O 7.11154141 10.67627777 8.94972377  
20 O 7.07637276 3.38645220 13.74209713  
O 7.25993673 3.50073908 8.83468723  
O 7.42543238 13.00072171 14.91281041  
O 7.32856290 1.28988144 0.18572556  
O 9.38499104 11.24673509 15.14208781  
25 O 9.36250784 2.94975025 14.95717251  
O 11.46116301 12.87145489 15.15311761  
O 11.31999325 1.18707388 15.12211644  
O 11.54400020 10.60998937 13.78286177  
O 11.69546683 10.72501667 8.85785342  
30 O 11.65925659 3.43949774 13.76957004  
O 11.47212045 3.54718672 8.84931453  
O 12.38182636 3.90624991 11.29124970  
O 12.30013936 10.09219740 11.32835463  
O 12.73681658 8.31596669 13.26161467  
35 O 12.80526183 8.38144789 9.34584499  
O 12.86620007 5.71345452 13.18590615  
O 12.77727903 5.77212038 9.43706043  
O 13.26672701 14.26474919 13.79267409  
O 13.23664273 14.10610825 8.85812465  
40 O 14.14955696 7.03143141 15.12611107  
O 14.14404718 10.56135785 13.18719220  
O 14.25317784 10.58684256 9.61612207  
O 14.25001796 3.45785002 13.11764266  
O 14.09125827 3.47360466 9.28974789  
45 O 14.15195666 14.17658031 11.32126336  
O 15.06252421 7.15262358 12.66724119  
O 15.04629511 7.07056817 9.99004172  
O 15.47087987 12.85345382 13.23538887  
O 15.54514298 12.89721404 9.43237704  
50 O 15.57772750 1.16598803 13.18340533  
O 15.45777167 1.20914136 9.40309119  
O 15.90110956 11.02171914 15.12277068  
O 15.99046515 2.98534197 15.08199319  
O 16.75549163 10.61000149 12.67369110  
55 O 16.87760467 10.68303022 9.99934951  
O 16.87005145 3.41367778 12.64271493  
O 16.67169950 3.48821175 9.97998263  
O 16.97167635 8.35606020 11.28074929

O 16.87970244 5.74088852 11.36326050  
Al 4.91779834 7.14015907 5.89716245  
Al 5.86149108 10.02406536 2.09732836  
Si 6.06714601 10.05609086 5.43860995  
5 Si 4.97641889 7.00164933 1.57905451  
Si 1.28354176 9.99291175 3.70017251  
Si 1.39102811 4.22492853 3.66590708  
Si 2.59407863 7.12067532 3.60995543  
Si 3.14080472 11.35214876 5.92577252  
10 Si 2.94891185 11.39763387 1.55291817  
Si 3.11526830 2.82461365 5.92927545  
Si 3.18235670 2.83546597 1.40312146  
Si 4.11480684 14.18402125 5.22774988  
Si 4.09776629 14.18159509 2.11265410  
15 Si 5.98124335 4.06555014 5.17147172  
Si 6.01634547 4.13054770 2.12113352  
Si 6.37236296 14.26539357 7.48856097  
Si 7.77221870 11.42368979 7.67483064  
Si 7.77415132 2.83793008 7.44977387  
20 Si 10.97228980 11.33880665 7.54373731  
Si 10.98175468 2.77659065 7.50321834  
Si 12.33572931 14.21060237 7.50587272  
Si 12.61506247 9.91333676 5.35436516  
Si 12.73942569 9.93934920 2.21915019  
25 Si 12.79179311 4.12078420 5.25332408  
Si 12.67710744 4.14600720 2.12301300  
Si 13.73339300 7.03020132 5.94626254  
Si 13.72002061 7.01044204 1.52523875  
Si 14.63478410 14.21198501 5.30686252  
30 Si 14.62506923 14.22817089 2.17021363  
Si 15.45706665 11.28447060 6.03973670  
Si 15.58800761 11.33168809 1.51540284  
Si 15.66752675 2.77222217 5.92382098  
Si 15.56003496 2.81865488 1.46888489  
35 Si 16.02538365 7.02461511 3.72506547  
Si 17.26538177 9.94164784 3.76466061  
Si 17.37294858 4.18020887 3.70664532  
Si 1.45446264 9.98649166 11.32319731  
Si 1.38900707 4.26489418 11.27697334  
40 Si 2.82399725 7.08297318 11.37611458  
Si 3.20583867 11.32216250 13.61917588  
Si 3.11309284 11.35292975 9.05660080  
Si 3.06085083 2.78869361 13.47704592  
Si 3.15370385 2.84591248 9.04813442  
45 Si 4.19298367 14.25096865 12.86476332  
Si 4.11184884 14.26423890 9.74183840  
Si 6.03708540 9.88671678 12.95624418  
Si 5.93665489 9.91177530 9.77302506  
Si 5.95508533 4.08753185 12.81217455  
50 Si 6.04767318 4.12108644 9.72301168  
Si 6.42726421 14.25861982 15.08677230  
Si 7.77321314 11.40847288 15.05829075  
Si 7.76179751 2.83038769 15.09921128  
Si 10.98920457 11.32082733 15.13458765  
55 Si 10.96200192 2.76925490 15.07369070  
Si 12.33767312 14.22446199 15.12952554  
Si 12.68993533 9.89989390 12.89324613  
Si 12.76953389 9.94772169 9.78198106



Si 12.79483744 4.12656403 12.84740792  
Si 12.68938152 4.17353010 9.71990239  
Si 13.70918594 7.04919578 13.55968373  
Si 13.70511918 7.05610489 9.07489137  
5 Si 14.61280029 14.18571577 12.88421141  
Si 14.59391604 14.17405370 9.75429986  
Si 15.56353443 11.26114720 13.55175792  
Si 15.64076592 11.29718928 9.15409763  
Si 15.66552273 2.75814122 13.50755295  
10 Si 15.54796312 2.79351628 9.05090861  
Si 15.97984021 7.08069432 11.32446611  
Si 17.39355250 9.92264247 11.34477338  
Si 17.33566516 4.18824132 11.28734099  
Si 5.12876449 6.96644909 13.57040943  
15 Si 5.07706809 6.96032426 9.09540813

224

H-FER(8) 19.146 14.375 15.182

H 9.54374004 7.23267487 7.58694660  
20 H 7.89632020 10.79142290 15.16003425  
H 2.92614662 7.69563452 9.51487803  
H 18.04768449 11.93723298 0.58017114  
H 0.98677003 13.63098754 5.93656556  
H 13.78495658 13.58481337 7.70299252  
25 H 17.98607878 3.49230807 9.83766466  
H 12.07898591 11.55413339 3.71668497  
O 11.45434885 7.52165371 3.33312544  
O 11.50858121 7.77476214 11.27117856  
O 11.40678236 14.07603826 4.15247503  
30 O 11.48155244 13.64899448 11.85759539  
O 12.97077013 11.96764389 3.77134269  
O 13.42787775 11.91831573 11.51949253  
O 13.32687673 9.31536714 3.87544671  
O 13.62320160 9.31151293 11.71828000  
35 O 13.88894510 13.97738678 5.17511753  
O 13.85268048 14.20796029 12.84068529  
O 13.46959501 14.28479217 2.51213710  
O 13.42134582 14.23300064 10.19252181  
O 13.31727799 6.96990640 5.14785720  
40 O 13.48440563 6.88919070 12.74990747  
O 13.91933360 7.09569240 2.54697454  
O 13.78103471 7.22375224 10.08339103  
O 14.45829336 14.28684407 7.79732731  
O 14.53389017 0.24406129 0.16671865  
45 O 14.33697258 6.49393183 0.03411620  
O 14.29851913 6.67516479 7.57061960  
O 14.61512908 4.74574132 5.72364572  
O 14.76450979 4.66880407 13.32846147  
O 14.92179665 4.71751057 1.94444356  
50 O 14.74114169 4.80924130 9.43485686  
O 14.97071797 2.14544567 5.95775497  
O 15.11118755 2.06159825 13.51731920  
O 14.83173864 2.12332124 2.05962758  
O 14.94341679 1.95770423 9.37298114  
55 O 15.29723987 10.96095489 5.29002494  
O 15.57659487 10.87428694 12.63828237  
O 15.32174349 10.89669060 2.44272721  
O 15.20399426 10.63183373 10.02246099

O 16.17886711 3.47766032 3.95940998  
O 16.27381204 3.40182725 11.52963129  
O 16.70316402 14.23292133 6.02121796  
O 16.40319580 14.09446871 13.53909011  
5 O 16.12533261 14.18112707 2.29067832  
O 16.02357288 13.93808466 9.99023375  
O 15.96260802 7.01464645 5.49929574  
O 16.07935044 7.02722024 13.27987326  
O 16.41076226 6.88437762 1.62759263  
10 O 16.30155254 6.94396176 9.28861247  
O 16.16568262 10.27394402 15.14823550  
O 16.23215756 10.27709997 7.66927339  
O 16.97342507 3.83323061 6.47182431  
O 17.12245540 3.74618959 14.03580820  
15 O 17.16640669 3.31437169 1.51970771  
O 17.34911268 3.51324655 9.09328413  
O 17.74078707 11.75835068 6.09031803  
O 17.79162085 11.83106927 13.76985023  
O 17.62276849 11.86826855 1.47308423  
20 O 17.52715307 11.84714070 9.43275839  
O 17.37386912 9.25087178 5.49083532  
O 17.61334377 9.20883283 13.18461259  
O 17.46032044 9.28768998 2.08278974  
O 17.51028292 9.26531449 9.78253725  
25 O 18.25060885 13.27070811 3.96277365  
O 18.04892859 13.33685627 11.56295818  
O 17.95776548 7.31502303 3.78330991  
O 17.94373067 7.24174056 11.40689160  
O 0.12906827 13.89842746 6.32176147  
30 O 19.04281805 14.17421656 13.86468232  
O 18.89399879 14.28439571 1.33527021  
O 18.52608698 14.29797982 9.11839339  
O 18.51240145 7.00188156 6.33231080  
O 18.67855109 6.88049966 13.90053048  
35 O 19.00499297 7.25268524 1.34917571  
O 18.92043400 7.13902211 8.97366346  
O 18.94935083 2.17429760 15.08921081  
O 18.91330416 2.17221788 7.38497530  
O 19.03517145 4.78043870 0.33783382  
40 O 19.14033792 4.80974291 7.68007396  
O 1.94661428 0.69934198 0.07417540  
O 2.01930687 0.46934065 8.06739409  
O 1.86779298 6.46230882 15.00840840  
O 1.81207599 6.69905328 7.38463845  
45 O 3.95031189 2.18093392 7.40168246  
O 4.10174665 2.23674308 15.12593138  
O 4.04016188 4.81853547 7.82932319  
O 3.90363033 4.83127227 0.29285870  
O 3.91892699 14.06395867 6.42591858  
50 O 4.05246100 14.23883448 13.96581723  
O 4.08730457 0.08104790 1.48191591  
O 4.47510796 0.14751568 9.01091490  
O 4.42374144 7.30777891 6.37660590  
O 4.20244406 6.97725590 13.93136762  
55 O 3.85016668 7.24739041 1.39624917  
O 3.77938946 7.39185578 9.14701622  
O 4.98313184 7.44430630 3.77145088  
O 4.89411419 7.68161811 11.50096864

O 4.87607554 13.97804724 3.95431100  
O 4.91654909 13.74539136 11.49701683  
O 5.48627562 12.04389650 5.67721237  
O 5.28300306 11.97765236 13.43928534  
5 O 5.41811249 12.22541284 1.99241201  
O 5.46455274 12.11282684 9.45851729  
O 5.64522366 9.45645400 5.37709079  
O 5.31666404 9.34686916 13.54224655  
O 5.36315374 9.35473232 1.93227825  
10 O 5.29518487 9.54390737 9.66931996  
O 5.87591155 3.61854991 6.33461909  
O 5.78896389 3.87182182 13.89902511  
O 5.94645739 3.50410847 1.37245098  
O 5.81913302 3.17092006 8.97595652  
15 O 6.64842071 10.58292796 7.59734997  
O 6.91961153 10.75781692 0.00857134  
O 6.49130224 0.10088091 6.04115652  
O 6.66093810 14.25166556 13.45482508  
O 6.66519139 0.20250565 2.10121912  
20 O 6.98076003 14.21388201 9.90853911  
O 6.92909838 7.15994788 5.52451934  
O 6.80425090 7.16906101 13.25335667  
O 6.45850523 6.94419735 1.59539083  
O 6.38947700 7.13074236 9.27244946  
25 O 6.81466009 3.50527526 3.87214110  
O 6.68477931 3.47826994 11.44342537  
O 7.88559716 10.90231736 5.29743146  
O 7.50236629 10.65038164 12.66645711  
O 7.85307947 10.75482314 2.60273588  
30 O 7.68869205 10.69335847 10.00584262  
O 8.10061430 2.19359870 5.83106350  
O 7.87482598 2.26489534 13.52238886  
O 8.26238589 2.30125718 1.98108469  
O 8.19752733 2.18770323 9.67857842  
35 O 8.18534424 4.80000012 5.76397122  
O 8.14961953 4.87084537 13.19335908  
O 8.12681785 4.92137547 2.03232162  
O 7.93760781 4.76392668 9.43362151  
O 8.50369516 0.36065742 7.75035676  
40 O 8.47282741 0.38492329 0.13033498  
O 8.68924870 6.76314811 7.49925690  
O 8.55243753 6.61262604 0.00501180  
O 9.00728033 14.14622742 5.24422077  
O 9.20606953 0.09511711 12.79470926  
45 O 9.27241772 14.28007694 2.57949107  
O 9.59985177 14.36771335 10.12681761  
O 9.55446527 6.98777219 5.06059973  
O 9.40970325 7.18252038 12.76953726  
O 8.93556460 7.40772656 2.48464541  
50 O 9.18168877 7.32823438 10.09200626  
O 9.84857202 12.00884250 3.88172153  
O 9.34605893 12.13615780 11.52659059  
O 9.70869490 9.42414796 4.02003599  
O 9.58044722 9.52810283 11.51180608  
55 Al 15.08523269 0.44758897 6.09208253  
Al 15.65152296 3.43904062 9.91092764  
Al 17.72279696 13.54747013 2.34719924  
Al 0.32499187 0.60100322 7.85020081

Al 3.50066485 6.41667855 7.51057308  
Al 6.30214512 10.77374646 1.82916301  
Al 7.98528562 6.45253951 9.23181647  
Al 14.35549854 10.68667642 3.87226939  
5 Si 13.02573870 7.74768842 3.73689021  
Si 9.90682472 7.92346153 11.39477582  
Si 13.11153183 7.78723033 11.44639511  
Si 12.96180055 13.68966451 3.91991063  
Si 13.06785006 13.49849514 11.61923718  
10 Si 14.45976855 10.66880306 11.46711836  
Si 14.98570782 0.47496252 13.81052922  
Si 14.79538827 0.51833559 1.75477664  
Si 14.75544570 0.38923499 9.43121950  
Si 14.55961980 6.34879964 5.99889327  
15 Si 14.68299419 6.26000066 13.64428610  
Si 14.89230580 6.29136699 1.54915596  
Si 14.77386437 6.37838389 9.10609730  
Si 15.66774201 3.51656745 5.51790275  
Si 15.83398874 3.45702236 13.07745288  
20 Si 15.78197962 3.40473162 2.37965490  
Si 16.62468553 10.56149163 6.10885318  
Si 16.78271377 10.52456297 13.65474081  
Si 16.55930819 10.51530482 1.52952389  
Si 16.62591377 10.51216778 9.22228292  
25 Si 17.87719881 13.27216060 5.51561133  
Si 17.81512688 13.38540369 13.16127680  
Si 17.57146567 13.37786252 10.00007739  
Si 17.44800216 7.64150033 5.30031254  
Si 17.56995361 7.58167823 12.95438011  
30 Si 17.70061108 7.67495765 2.22298358  
Si 17.64869121 7.64342901 9.85134828  
Si 18.05424232 3.49397529 0.16269557  
Si 18.14244766 3.54855683 7.54113661  
Si 0.33072003 0.63960685 0.03559570  
35 Si 0.25135697 6.42628442 7.56931384  
Si 0.27259184 6.33389702 0.06266666  
Si 3.57023831 0.63437519 7.73805368  
Si 3.54961457 0.71678912 0.08783707  
Si 3.45974905 6.38011295 0.08156695  
40 Si 4.90040677 3.47885007 7.65387541  
Si 4.94371182 3.60629177 0.08953467  
Si 5.19384941 13.63963437 5.51029301  
Si 5.22928838 13.58496093 13.08153203  
Si 5.26309826 13.77211921 2.37642965  
45 Si 5.44938710 13.66745671 9.95560238  
Si 5.44224133 7.83553129 5.28149645  
Si 5.31139806 7.76815138 13.07672929  
Si 5.17230136 7.78744453 2.18776104  
Si 5.19520534 7.94417765 9.92749560  
50 Si 6.41171430 10.74728212 5.98917756  
Si 6.21164451 10.68266891 13.62378732  
Si 6.28447035 10.74707752 9.16972272  
Si 7.21634662 3.50988056 5.45013174  
Si 7.12326215 3.61310322 12.99908216  
55 Si 7.27411458 3.55877512 2.30857864  
Si 7.15607129 3.43601107 9.86906912  
Si 8.01994754 0.61276449 6.21801478  
Si 8.04759350 0.67012028 13.76504258

|                  |            |             |             |
|------------------|------------|-------------|-------------|
| Si               | 8.15322162 | 0.69709875  | 1.69994704  |
| Si               | 8.30421467 | 0.60977573  | 9.34867520  |
| Si               | 8.28773745 | 6.39945225  | 5.86674439  |
| Si               | 8.23058668 | 6.44639180  | 13.60011955 |
| <sup>5</sup> Si  | 8.00933307 | 6.46980249  | 1.53391033  |
| Si               | 8.76981873 | 10.75807476 | 3.92307499  |
| Si               | 8.53873545 | 10.75025850 | 11.39505298 |
| Si               | 9.85051004 | 13.64885863 | 3.95835603  |
| Si               | 9.89719593 | 13.66426071 | 11.56771844 |
| <sup>10</sup> Si | 9.91968589 | 7.84177101  | 3.70000602  |
